# Supplementary material for: Number and timing of primary cleft lip and palate repair surgeries in England: whole nation study of electronic health records before and during the COVID-19 pandemic
Source: PubMed Central journal article supplement (PMC10276964; doi:10.1136/bmjopen-2023-071973), 2023-06-13
Supplement: bmjopen-2023-071973.draft_revisions.pdf [file bmjopen-2023-071973.draft_revisions.pdf]

# BMJ Open

BMJ Open is committed to open peer review. As part of this commitment we make the peer review history of every article we publish publicly available.

When an article is published we post the peer reviewers' comments and the authors' responses online. We also post the versions of the paper that were used during peer review. These are the versions that the peer review comments apply to.

The versions of the paper that follow are the versions that were submitted during the peer review process. They are not the versions of record or the final published versions. They should not be cited or distributed as the published version of this manuscript.

BMJ Open is an open access journal and the full, final, typeset and author-corrected version of record of the manuscript is available on our site with no access controls, subscription charges or pay-per-view fees (<http://bmjopen.bmj.com>).

If you have any questions on BMJ Open's open peer review process please email [info.bmjopen@bmj.com](mailto:info.bmjopen@bmj.com)

# BMJ Open

## Number and timing of primary cleft lip and palate repair surgeries in England: whole nation study of electronic health records before and during the COVID-19 pandemic.

|                               |                                                                                                                                                                                                                                                                                                                                                                                                                                                                                                                                                                                                                                      |
|-------------------------------|--------------------------------------------------------------------------------------------------------------------------------------------------------------------------------------------------------------------------------------------------------------------------------------------------------------------------------------------------------------------------------------------------------------------------------------------------------------------------------------------------------------------------------------------------------------------------------------------------------------------------------------|
| Journal:                      | <i>BMJ Open</i>                                                                                                                                                                                                                                                                                                                                                                                                                                                                                                                                                                                                                      |
| Manuscript ID                 | bmjopen-2023-071973                                                                                                                                                                                                                                                                                                                                                                                                                                                                                                                                                                                                                  |
| Article Type:                 | Original research                                                                                                                                                                                                                                                                                                                                                                                                                                                                                                                                                                                                                    |
| Date Submitted by the Author: | 19-Jan-2023                                                                                                                                                                                                                                                                                                                                                                                                                                                                                                                                                                                                                          |
| Complete List of Authors:     | Etoori, David; University College London Institute of Health Informatics Park, Min Hae; London School of Hygiene & Tropical Medicine<br>Blackburn, Ruth; University College London Institute of Health Informatics<br>Fitzsimons, Kate; Royal College of Surgeons of England<br>Butterworth, Sophie; Royal College of Surgeons of England<br>Medina, Jibby; Royal College of Surgeons of England, Clinical Effectiveness Unit<br>Mc Grath-Lone, Louise; University College London Institute of Education<br>Russell, Craig; Queen Elizabeth University Hospital<br>van der Meulen, Jan; London School of Hygiene & Tropical Medicine |
| Keywords:                     | COVID-19, Paediatric surgery < SURGERY, EPIDEMIOLOGY                                                                                                                                                                                                                                                                                                                                                                                                                                                                                                                                                                                 |
|                               |                                                                                                                                                                                                                                                                                                                                                                                                                                                                                                                                                                                                                                      |

SCHOLARONE™  
Manuscripts

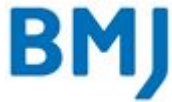

I, the Submitting Author has the right to grant and does grant on behalf of all authors of the Work (as defined in the below author licence), an exclusive licence and/or a non-exclusive licence for contributions from authors who are: i) UK Crown employees; ii) where BMJ has agreed a CC-BY licence shall apply, and/or iii) in accordance with the terms applicable for US Federal Government officers or employees acting as part of their official duties; on a worldwide, perpetual, irrevocable, royalty-free basis to BMJ Publishing Group Ltd ("BMJ") its licensees and where the relevant Journal is co-owned by BMJ to the co-owners of the Journal, to publish the Work in this journal and any other BMJ products and to exploit all rights, as set out in our [licence](#).

The Submitting Author accepts and understands that any supply made under these terms is made by BMJ to the Submitting Author unless you are acting as an employee on behalf of your employer or a postgraduate student of an affiliated institution which is paying any applicable article publishing charge ("APC") for Open Access articles. Where the Submitting Author wishes to make the Work available on an Open Access basis (and intends to pay the relevant APC), the terms of reuse of such Open Access shall be governed by a Creative Commons licence – details of these licences and which [Creative Commons](#) licence will apply to this Work are set out in our licence referred to above.

Other than as permitted in any relevant BMJ Author's Self Archiving Policies, I confirm this Work has not been accepted for publication elsewhere, is not being considered for publication elsewhere and does not duplicate material already published. I confirm all authors consent to publication of this Work and authorise the granting of this licence.

**Title:** Number and timing of primary cleft lip and palate repair surgeries in England: whole nation study of electronic health records before and during the COVID-19 pandemic.

**Authors:** David Etoori<sup>1</sup>, Min Hae Park<sup>2</sup>, Ruth Blackburn<sup>1\*</sup>, Kate Fitzsimons,<sup>3</sup> Sophie Butterworth,<sup>3</sup> Jibby Medina<sup>3</sup>, Louise Mc Grath-Lone<sup>1</sup>, Craig Russell<sup>4</sup>, Jan Van Der Meulen<sup>2</sup>

**Affiliations:**

1. University College London Institute of Health Informatics, 222 Euston Road, London, NW1 2DA, UK.
2. London School of Hygiene and Tropical Medicine, Keppel Street, London, WC1E 7HT, UK.
3. Clinical Effectiveness Unit, Royal College of Surgeons of England, 38 – 43 Lincoln's Inn Fields, London, UK.
4. Royal Hospital for Children, Queen Elizabeth University Hospital, Glasgow, UK

**\* Corresponding author:**

Dr Ruth Blackburn, 222 Euston Road, London, NW1 2DA, UK, Email:

[r.blackburn@ucl.ac.uk](mailto:r.blackburn@ucl.ac.uk)

**Email addresses:** DE: [d.etoori@ucl.ac.uk](mailto:d.etoori@ucl.ac.uk); MHP: [MinHae.Park@lshtm.ac.uk](mailto:MinHae.Park@lshtm.ac.uk); RB:

[r.blackburn@ucl.ac.uk](mailto:r.blackburn@ucl.ac.uk); KF: [kfitzsimons@rcseng.ac.uk](mailto:kfitzsimons@rcseng.ac.uk); SB: [sbutterworth@rcseng.ac.uk](mailto:sbutterworth@rcseng.ac.uk); JM;

[jmedina@rcseng.ac.uk](mailto:jmedina@rcseng.ac.uk); LMcGL: [l.mcgrath-lone@ucl.ac.uk](mailto:l.mcgrath-lone@ucl.ac.uk); CR:

[craig.russell@ggc.scot.nhs.uk](mailto:craig.russell@ggc.scot.nhs.uk); JVDM: [Jan.vanderMeulen@lshtm.ac.uk](mailto:Jan.vanderMeulen@lshtm.ac.uk)

**Key words:** COVID-19; orofacial cleft, cleft lip; cleft palate; timing of surgery

1  
2  
3 **Word count: Abstract 226; Text 2284**  
4

5  
6 **ABSTRACT**  
7

8  
9 **Objective** To quantify differences in number and timing of first primary cleft lip and palate  
10 (CLP) repair procedures during the first year of the COVID-19 pandemic (1st April 2020 to  
11 31st March 2021; 2020/21) compared to the preceding year (1st April 2019 to 31st March  
12 2020; 2019/21).  
13  
14  
15

16  
17  
18 **Design** National study of administrative hospital data.  
19

20  
21  
22 **Setting** National Health Service hospitals in England.  
23

24  
25 **Study population** Children <5 years undergoing primary repair for an orofacial cleft (OPCS-  
26 4 codes F031, F291)  
27  
28

29  
30 **Main exposure** Procedure date (2020/21 vs 2019/20)  
31

32  
33 **Main outcomes** Numbers and timing (age in months) of first primary CLP procedures.  
34

35  
36 **Results** 1,716 CLP primary repair procedures were included in the analysis. In 2020/21, 774  
37 CLP procedures were carried out compared to 942 in 2019/20, a reduction of 17.8 % (95%  
38 confidence interval 9.5% to 25.4%). The reduction varied over time in 2020/21, with no  
39 surgeries at all during the first two months (April and May 2020). Compared to 2019/20, first  
40 primary lip repair procedures performed in 2020/21 were delayed by 1.6 months on average  
41 (95% confidence interval 0.9 to 2.2 months). Delays in primary palate repairs were smaller  
42 on average but varied across the nine geographical regions.  
43  
44  
45  
46  
47  
48  
49  
50

51  
52  
53 **Conclusion** There were significant reductions in the number and delays in timing of first  
54 primary CLP repair procedures in England during the first year of the pandemic, which may  
55 affect long-term outcomes.  
56  
57  
58  
59  
60

## INTRODUCTION

1  
2  
3  
4  
5  
6  
7  
8  
9  
10  
11  
12  
13  
14  
15  
16  
17  
18  
19  
20  
21  
22  
23  
24  
25  
26  
27  
28  
29  
30  
31  
32  
33  
34  
35  
36  
37  
38  
39  
40  
41  
42  
43  
44  
45  
46  
47  
48  
49  
50  
51  
52  
53  
54  
55  
56  
57  
58  
59  
60

Around 1 in 670 children in the England, Wales and Northern Ireland are born alive with an orofacial cleft that may affect only the lip, only the palate, or both. (1) An orofacial cleft can have significant effects on children's lives, including ongoing hearing loss, speech and language difficulties, psychosocial difficulties, and lower educational attainment. (2–7) It is recommended that children with a cleft palate have surgery to repair their cleft when they are between 6 and 12 months old as this would reduce the likelihood of negative outcomes. (8,9) Cleft lip repair procedures are usually performed when the children are between 3 and 6 months old, a time frame suggested by a handful of small studies showing that early repair leads to better aesthetic results, (10,11) improved feeding,(10) and better psychosocial development. (12)

Access to healthcare declined markedly during the COVID-19 pandemic. (13,14) This decline represents both the postponement and cancellation of planned care. For some time-sensitive procedures such as cleft lip and palate repair, delays could have a detrimental effect on long-term outcomes.

This study aimed to quantify the impact of the COVID-19 pandemic on the number and the timing of first primary cleft lip and/or palate (CLP) repair procedures using national longitudinal administrative hospital data from the English National Health Service (NHS). We hypothesised that there would be a reduction in the number of first primary CLP repair procedures during the COVID-19 pandemic year (2020/21) compared to the preceding year (2019/20). We defined the start of the first COVID-19 pandemic year as 1<sup>st</sup> April 2020 as this coincides closely with the official start of the first nationwide lockdown in England on 23<sup>rd</sup> March 2020. (15)

1  
2  
3 We also hypothesised that first primary CLP repair procedures would be delayed during the  
4 pandemic, so that the children at the time of surgery would be older than in the preceding  
5  
6 year. Quantifying the extent of delays to surgery is important for planning of the future needs  
7  
8 of these children.  
9  
10

## 11 12 13 **METHODS**

### 14 15 16 **Study design**

17  
18 Before/after study of the numbers of procedures, and age at surgery for primary repair of cleft  
19 lip and/or cleft palate in hospitals in England before (2019/20) or during (2020/21) the  
20  
21 COVID-19 pandemic.  
22  
23  
24

### 25 26 27 **Data source and study population**

28  
29 We used the Hospital Episode Statistics (HES), a national database including records of all  
30 episodes in NHS hospitals derived from administrative data.(16) HES records include  
31  
32 diagnostic fields coded according to the International Classification of Diseases – 10<sup>th</sup>  
33  
34 revision (ICD-10) (17) and procedure fields coded according to the Population Consensus  
35  
36 and Surveys Classification of Interventions and Procedures – 4<sup>th</sup> revisions (OPCS-4).(18)  
37  
38  
39

40  
41 We identified all children born after 1<sup>st</sup> April 2014, who were considered to have an orofacial  
42  
43 cleft because they had both a record with relevant diagnostic codes before their second  
44  
45 birthday (or until 31<sup>st</sup> March, 2021, whatever came earlier) and a record with relevant CLP  
46  
47 repair procedure codes before their fifth birthday (or until 31<sup>st</sup> March, 2021, whatever came  
48  
49 earlier; see supplementary information 1 for code lists). We excluded children without a birth  
50  
51 record in HES and children born from multiple pregnancies. Births recorded in HES represent  
52  
53 97% of all births in England. (19) Please see Supplementary Figure 1.  
54  
55  
56

### 57 58 **Outcome and patient characteristics**

59  
60 In the children identified with an orofacial cleft, we determined the date of their first primary

1  
2  
3 CLP repair procedures with primary lip repair and primary palate repairs treated separately  
4  
5 such that some children contributed more than one surgery. Secondary procedures were  
6  
7 excluded from the analytical sample as other factors might influence their timing, including  
8  
9 the timing of the primary surgery. We used diagnostic codes to distinguish four cleft types  
10  
11 (see supplementary information 2 for code lists): cleft lip only (CL), cleft palate only (CP),  
12  
13 unilateral cleft lip and palate (UCLP), bilateral cleft lip and palate (BCLP). We used  
14  
15 procedure codes to capture the type of surgery: primary lip repair (F031) and primary palate  
16  
17 repair (F291). We also used ICD-10 codes to determine whether there were other additional  
18  
19 congenital malformations. (20,21) Quintiles of the national distribution of the 2019 Index of  
20  
21 Multiple Deprivation (IMD) rankings of 32,844 Lower Super Output Areas (LSOA; areas  
22  
23 with typically 1,500 inhabitants and 600 households) were used to categorise children into 5  
24  
25 groups according to their socioeconomic background. (22) Ethnicity was coded as White, and  
26  
27 minority ethnicity including Black, Asian, mixed race, and other. Nine geographic regions of  
28  
29 residence that correspond to the 9 regionally commissioned cleft services of England were  
30  
31 derived from the LSOA.  
32  
33  
34  
35  
36

### 37 38 **Statistical analyses**

39  
40 We counted the number of first primary CLP repair procedures in 2020/21 and 2019/20 and  
41  
42 calculated the relative difference between these numbers. Confidence intervals for these  
43  
44 relative differences were calculated using the conditional method for testing differences  
45  
46 between two Poisson means. (23) We used the Mantel-Haenszel test of homogeneity to  
47  
48 investigate whether the difference between the number of procedures in 2019/20 and 2020/21  
49  
50 varied according to the children's characteristics.  
51  
52  
53

54  
55 To investigate changes in timing of first primary CLP repair procedures, we compared the  
56  
57 mean age at the time of the first primary CLP procedures carried out in 2019/20 and 2020/21  
58  
59 with the t-test. Linear regression with interaction terms was used to test whether the  
60



1  
2  
3 difference between the means in 2019/20 and 2020/21 varied according to the children's  
4 characteristics.  
5  
6

7  
8 Children with missing data on a specific characteristic were not included in the analyses  
9 involving that characteristic. A p-value <0.05 was considered to indicate a statistically  
10 significant result. All analyses were performed in Stata V.17 (Statacorp). (24)  
11  
12  
13  
14

### 15 16 **Patient and public involvement**

17  
18 The ECHILD project undertakes regular patient and public involvement (PPI) including the  
19 acceptability of the use of de-identified data from healthcare and education settings, and  
20 research priorities for these datasets. Children and parents in our PPI workshops identified  
21 understanding the health and education impact of the pandemic on children with additional  
22 clinical needs (such as CLP) as a key priority for research.  
23  
24  
25  
26  
27  
28  
29

## 30 31 **RESULTS**

### 32 33 **Study population**

34  
35 We identified 6,438 children with a CLP procedure code recorded before the age of 5  
36 between 1<sup>st</sup> April 2014 and 31<sup>st</sup> March 2021. Of these, 680 (10.6%) did not have a birth  
37 record or were born from multiple pregnancies and 257 (4.0%) did not have a CLP diagnostic  
38 code recorded before the age of 2. These children were therefore excluded (Supplementary  
39 Figure 1).  
40  
41  
42  
43  
44  
45  
46  
47

### 48 49 Number of first primary CLP repair procedures during the COVID-19 pandemic

50  
51 In the remaining 5,501 children, we identified 774 first primary CLP procedures in 2020/21  
52 corresponding to 321 first lip repair and 453 first palate repairs. This was in comparison to  
53 942 procedures (408 lip repairs, 534 palate repairs) in 2019/20, a reduction of 17.8 % (95%  
54 confidence interval 9.5% to 25.4%; p <0.001; Table 1).  
55  
56  
57  
58  
59  
60

**Table 1:** Number of first primary cleft lip and palate repair procedures by year of surgery and the children's characteristics

|                             | Number of procedures |         |                              |         |                |         |                              |         |
|-----------------------------|----------------------|---------|------------------------------|---------|----------------|---------|------------------------------|---------|
|                             | Lip repair           |         |                              |         | Palate repairs |         |                              |         |
| Year of surgery*            | 2019/20              | 2020/21 | Relative difference (95% CI) | p-value | 2019/20        | 2020/21 | Relative difference (95% CI) | p-value |
| All                         | 408                  | 321     | -21.32 (-32.24, -8.71)       | 0.0013  | 534            | 453     | -15.17 (-25.32, -3.67)       | 0.0099  |
| Cleft type                  | (p=0.6389) **        |         |                              |         | (p=0.8277) **  |         |                              |         |
| Cleft lip only              | 157                  | 116     | -26.11 (-42.39, -5.47)       | 0.0131  | —              | —       | —                            | —       |
| Cleft palate only           | —                    | —       | —                            | —       | 284            | 233     | -17.96 (-31.31, -2.09)       | 0.0249  |
| Unilateral CLP              | 165                  | 141     | -14.54 (-32.24, 7.65)        | 0.1707  | 164            | 147     | -10.37 (-28.75, 12.67)       | 0.3358  |
| Bilateral CLP               | 86                   | 64      | -25.58 (-47.01, 4.05)        | 0.073   | 86             | 73      | -15.12 (-38.73, 17.32)       | 0.3041  |
| Congenital malformations    | (p=0.1867) **        |         |                              |         | (p=0.0210) **  |         |                              |         |
| No additional malformations | 282                  | 207     | -26.60 (-38.95, -11.86)      | 0.0007  | 240            | 237     | -1.25 (-17.82, 18.66)        | 0.8909  |
| Additional malformations    | 126                  | 114     | -9.52 (-30.39, 17.50)        | 0.4396  | 294            | 216     | -26.53 (-38.65, -12.12)      | 0.0005  |
| IMD quintile                | (p=0.9045) **        |         |                              |         | (p=0.8962) **  |         |                              |         |
| Q1 (Most deprived)          | 94                   | 86      | -8.51 (-32.51, 23.90)        | 0.5522  | 127            | 114     | -10.24 (-30.91, 16.51)       | 0.4034  |
| Q2                          | 79                   | 61      | -22.78 (-45.64, 9.22)        | 0.1293  | 117            | 98      | -16.24 (-36.62, 10.49)       | 0.196   |
| Q3                          | 65                   | 53      | -18.46 (-44.36, 19.02)       | 0.2712  | 92             | 78      | -15.22 (-38.11, 15.90)       | 0.2843  |
| Q4                          | 61                   | 45      | -26.23 (-50.95, 10.23)       | 0.1215  | 62             | 51      | -17.74 (-44.35, 21.11)       | 0.3029  |
| Q5 (least deprived)         | 47                   | 36      | -23.40 (-51.79, 20.79)       | 0.2299  | 55             | 57      | 3.51 (-42.28, 34.61)         | 0.8509  |
| Missing                     | 62                   | 40      | —                            | —       | 81             | 55      | —                            | —       |
| Ethnicity                   | (p=0.7415) **        |         |                              |         | (p=0.3669) **  |         |                              |         |
| White/White British         | 327                  | 253     | -22.63 (-34.60, -8.55)       | 0.0021  | 414            | 341     | -17.63 (-28.84, -4.71)       | 0.0079  |
| Minority ethnicity          | 74                   | 61      | -17.57 (-42.25, 17.28)       | 0.2649  | 112            | 106     | -5.36 (-28.12, 24.55)        | 0.6852  |
| Missing                     | 7                    | 7       | —                            | —       | 8              | 6       | —                            | —       |
| Region                      | (p=0.4821) **        |         |                              |         | (p=0.3715) **  |         |                              |         |
| North-East                  | 25                   | 20      | -8.70 (-51.94, 72.56)        | 0.766   | 20             | 30      | 34.37 (-17.37, 64.03)        | 0.1337  |

|                 |                         |     |                         |         |                         |     |                         |         |
|-----------------|-------------------------|-----|-------------------------|---------|-------------------------|-----|-------------------------|---------|
| North-West      | 45                      | 50  | 6.12 (-43.34, 38.61)    | 0.7596  | 75                      | 60  | -18.42 (-42.63, 15.61)  | 0.2349  |
| Yorkshire       | 40                      | 30  | -21.05 (-52.76, 30.85)  | 0.3356  | 55                      | 40  | -28.30 (-54.01, 10.82)  | 0.1174  |
| East Midlands   | 35                      | 30  | -14.29 (-49.17, 43.71)  | 0.5386  | 35                      | 25  | -27.78 (-58.13, 22.98)  | 0.2074  |
| West Midlands   | 30                      | 30  | -3.12 (-42.83, 63.95)   | 0.9007  | 45                      | 50  | 9.80 (-37.07, 40.79)    | 0.6137  |
| East of England | 30                      | 25  | -28.12 (-59.84, 26.73)  | 0.2288  | 40                      | 30  | -28.57 (-56.83, 16.87)  | 0.1597  |
| London          | 50                      | 35  | -28.57 (-55.07, 12.49)  | 0.1284  | 60                      | 60  | 0 (-45.48, 31.26)       | 1.0000  |
| South-East      | 50                      | 45  | -9.61 (-40.40, 36.74)   | 0.6173  | 65                      | 65  | -1.54 (-31.38, 41.24)   | 0.9302  |
| South-West      | 35                      | 15  | -57.14 (-78.25, -19.47) | 0.0046  | 40                      | 30  | -21.95 (-52.42, 27.01)  | 0.2954  |
| Missing         | 65                      | 40  | —                       | —       | 95                      | 60  | —                       | —       |
| <b>Quarter</b>  | <b>(p&lt;0.0001) **</b> |     |                         |         | <b>(p&lt;0.0001) **</b> |     |                         |         |
| Q1 (Apr-Jun)    | 105                     | 10  | -90.48 (-95.56, -81.78) | <0.0001 | 136                     | 27  | -80.15 (-87.38, -69.83) | <0.0001 |
| Q2 (Jul-Sep)    | 107                     | 110 | 2.73 (-26.16, 28.10)    | 0.839   | 149                     | 182 | 18.13 (-2.22, 34.52)    | 0.07    |
| Q3 (Oct-Dec)    | 103                     | 140 | 26.43 (4.43, 43.52)     | 0.0177  | 123                     | 130 | 5.38 (-22.01, 26.66)    | 0.6606  |
| Q4 (Jan-Mar)    | 93                      | 61  | -34.41 (-53.31, -8.43)  | 0.0099  | 126                     | 114 | -9.52 (-30.39, 17.50)   | 0.4396  |

\* 2020/21: first year of COVID-19 pandemic; 2019/20: preceding year.

\*\* – Mantel-Haenszel test for homogeneity, testing if the relative differences vary according to the children's characteristics.

Region figures rounded to the nearest 5 for disclosure control.

1  
2  
3 The reduction in the number of first lip repair observed in 2020/21 did not vary significantly  
4 according to the children's characteristics (p always >0.1 for cleft type, presence of additional  
5 anomalies, deprivation or ethnicity) or geographic region of residence. However, the  
6 reduction in lip repairs did vary according to quarterly period (p<0.0001).  
7  
8  
9  
10  
11  
12

13 The reduction in the number of the first primary palate repair procedures in 2020/21 varied  
14 according to quarterly period (p<0.0001) and was significantly larger for children with  
15 additional congenital malformations (p=0.0210).  
16  
17  
18  
19  
20

21 No repair procedures were carried out in the first two months of the study period (1<sup>st</sup> April to  
22 31<sup>st</sup> May 2020), primary cleft surgery resumed in the third month of the first quarter. The  
23 numbers of first primary procedures undertaken in the second and third quarters of 2020/21  
24 (1<sup>st</sup> July and 31<sup>st</sup> December 2020) were higher and the number in the fourth quarter (between  
25 1<sup>st</sup> January to 31<sup>st</sup> March) was lower than in the corresponding months in the preceding year.  
26  
27  
28  
29  
30  
31  
32 (Figure 1)  
33  
34

### 35 **Timing of CLP surgeries before and during the COVID-19 pandemic**

36  
37 The mean age at the first primary lip repairs increased by 1.6 months (95% CI: 0.9, 2.2) in the  
38 first year of the COVID-19 pandemic compared to 2019/20 (see also Figure 2). This increase  
39 in age did not vary according to the children's characteristics (p always > 0.1). The largest  
40 increases in mean age of lip repairs were in the South-West 3.9 months (95% CI:), the East  
41 Midlands 3.5 months (95% CI:), and the first quarter of 2020/2021 3.4 months (95% CI:).  
42  
43  
44  
45  
46  
47  
48  
49 (Table 2)  
50  
51  
52  
53  
54  
55  
56  
57  
58  
59  
60

**Table 2:** Mean age at first primary CLP repair surgery by year of surgery and exposure variables

|                             | Mean age at surgery in months (95% CI) |                   |                    |         |                      |                      |                     |         |
|-----------------------------|----------------------------------------|-------------------|--------------------|---------|----------------------|----------------------|---------------------|---------|
|                             | Lip repair                             |                   |                    |         | Palate repairs       |                      |                     |         |
| Year of surgery             | 2019/20                                | 2020/21           | Difference         | p-value | 2019/20              | 2020/21              | Difference          | p-value |
| All                         | 5.72 (5.28, 6.15)                      | 7.30 (6.84, 7.76) | 1.58 (0.94, 2.22)  | <0.0001 | 11.19 (10.60, 11.77) | 11.81 (11.30, 12.33) | 0.63 (-0.16, 1.42)  | 0.1209  |
| Cleft type                  | <b>(p=0.4166)**</b>                    |                   |                    |         | <b>(p=0.9728)**</b>  |                      |                     |         |
| Cleft lip only              | 5.42 (4.77, 6.08)                      | 7.14 (6.22, 8.05) | 1.71 (0.62, 2.80)  | 0.0022  | —                    | —                    | —                   | —       |
| Cleft palate only           | —                                      | —                 | —                  | —       | 12.74 (11.92, 13.57) | 13.50 (12.74, 14.25) | 0.75 (-0.39, 1.88)  | 0.1961  |
| Unilateral CLP              | 5.46 (4.83, 6.10)                      | 7.34 (6.81, 7.87) | 1.88 (1.04, 2.72)  | <0.0001 | 8.96 (8.10, 9.82)    | 9.66 (9.08, 10.25)   | 0.70 (-0.35, 1.76)  | 0.1919  |
| Bilateral CLP               | 6.75 (5.58, 7.93)                      | 7.51 (6.31, 8.70) | 0.75 (-0.94, 2.45) | 0.3816  | 10.28 (8.73, 11.83)  | 10.77 (9.29, 12.24)  | 0.49 (-1.66, 2.64)  | 0.6525  |
| Congenital malformations    | <b>(p=0.8086)**</b>                    |                   |                    |         | <b>(p=0.4014)**</b>  |                      |                     |         |
| No additional malformations | 5.02 (4.68, 5.37)                      | 6.56 (6.14, 6.98) | 1.53 (0.99, 2.07)  | <0.0001 | 9.27 (8.64, 9.90)    | 10.47 (9.95, 10.98)  | 1.20 (0.38, 2.01)   | 0.0039  |
| Additional malformations    | 7.27 (6.13, 8.42)                      | 8.65 (7.61, 9.68) | 1.37 (-0.17, 2.91) | 0.0813  | 12.75 (11.86, 13.65) | 13.29 (12.41, 14.18) | 0.54 (-0.75, 1.83)  | 0.4102  |
| IMD quintile                | <b>(p=0.9259)**</b>                    |                   |                    |         | <b>(p=0.9099)**</b>  |                      |                     |         |
| Q1 (Most deprived)          | 5.42 (4.58, 6.26)                      | 7.29 (6.35, 8.23) | 1.87 (0.62, 3.12)  | 0.0035  | 10.38 (9.29, 11.48)  | 11.64 (10.40, 12.88) | 1.26 (-0.38, 2.90)  | 0.132   |
| Q2                          | 6.34 (5.09, 7.59)                      | 8.25 (6.68, 9.82) | 1.91 (-0.05, 3.87) | 0.0561  | 10.87 (9.83, 11.91)  | 11.47 (10.54, 12.40) | 0.60 (-0.82, 2.01)  | 0.4067  |
| Q3                          | 5.85 (5.02, 6.69)                      | 7.18 (6.55, 7.81) | 1.33 (0.25, 2.40)  | 0.0164  | 10.42 (9.29, 11.55)  | 11.51 (10.52, 12.50) | 1.09 (-0.42, 2.61)  | 0.1557  |
| Q4                          | 5.96 (4.52, 7.41)                      | 7.06 (5.77, 8.35) | 1.10 (-0.89, 3.09) | 0.2772  | 11.22 (9.63, 12.80)  | 12.45 (10.62, 14.28) | 1.23 (-1.15, 3.62)  | 0.3086  |
| Q5 (least deprived)         | 4.91 (4.40, 5.41)                      | 6.83 (5.95, 7.72) | 1.93 (0.98, 2.87)  | 0.0001  | 11.78 (10.21, 13.35) | 13.68 (12.05, 15.32) | 1.91 (-0.34, 4.15)  | 0.0949  |
| Ethnicity                   | <b>(p=0.9406)**</b>                    |                   |                    |         | <b>(p=0.9348)**</b>  |                      |                     |         |
| White/White British         | 5.54 (5.09, 6.00)                      | 7.23 (6.72, 7.75) | 1.69 (1.00, 2.38)  | <0.0001 | 11.34 (10.64, 12.04) | 11.94 (11.34, 12.54) | 0.60 (-0.34, 1.54)  | 0.2129  |
| Minority ethnicity          | 6.00 (5.06, 6.93)                      | 7.63 (6.44, 8.82) | 1.63 (0.15, 3.11)  | 0.0312  | 10.81 (9.80, 11.82)  | 11.49 (10.40, 12.57) | 0.68 (-0.80, 2.15)  | 0.3659  |
| Region                      | <b>(p=0.2113)**</b>                    |                   |                    |         | <b>(p=0.0022)**</b>  |                      |                     |         |
| North-East                  | 4.92 (3.44, 6.41)                      | 5.51 (4.30, 6.72) | 0.59 (-1.29, 2.47) | 0.5297  | 10.27 (8.15, 12.39)  | 9.76 (8.39, 11.13)   | -0.51 (-2.86, 1.83) | 0.6622  |
| North-West                  | 5.10 (4.08, 6.12)                      | 7.13 (5.80, 8.46) | 2.03 (0.36, 3.70)  | 0.0176  | 8.45 (7.36, 9.54)    | 11.02 (9.15, 12.88)  | 2.56 (0.51, 4.62)   | 0.0146  |
| Yorkshire                   | 4.87 (4.08, 5.66)                      | 7.00 (5.55, 8.45) | 2.13 (0.59, 3.66)  | 0.0072  | 9.68 (8.37, 10.99)   | 11.21 (8.32, 14.10)  | 1.53 (-1.31, 4.37)  | 0.2881  |

|                 |                     |                    |                    |         |                      |                      |                     |         |
|-----------------|---------------------|--------------------|--------------------|---------|----------------------|----------------------|---------------------|---------|
| East Midlands   | 4.71 (3.95, 5.46)   | 8.16 (6.81, 9.51)  | 3.45 (2.00, 4.91)  | <0.0001 | 9.15 (7.56, 10.74)   | 11.36 (9.30, 13.42)  | 2.21 (-0.29, 4.72)  | 0.0827  |
| West Midlands   | 6.41 (4.02, 8.80)   | 8.33 (7.59, 9.06)  | 1.91 (-0.57, 4.40) | 0.1283  | 10.34 (8.60, 12.08)  | 11.20 (10.43, 11.96) | 0.86 (-0.95, 2.67)  | 0.3492  |
| East of England | 5.55 (4.47, 6.64)   | 5.88 (5.11, 6.65)  | 0.33 (-1.08, 1.73) | 0.6439  | 12.12 (9.60, 14.64)  | 12.14 (10.05, 14.22) | 0.01 (-3.40, 3.43)  | 0.9935  |
| London          | 6.36 (4.50, 8.22)   | 6.88 (4.56, 9.21)  | 0.52 (-2.38, 3.43) | 0.7203  | 12.04 (10.09, 13.99) | 10.83 (10.02, 11.64) | -1.21 (-3.30, 0.87) | 0.252   |
| South-East      | 6.51 (5.02, 8.00)   | 8.34 (6.84, 9.84)  | 1.83 (-0.26, 3.92) | 0.0858  | 14.16 (12.34, 15.97) | 13.91 (12.61, 15.21) | -0.24 (-2.46, 1.97) | 0.829   |
| South-West      | 5.83 (5.18, 6.48)   | 9.72 (8.50, 10.93) | 3.89 (2.66, 5.12)  | <0.0001 | 10.96 (9.59, 12.33)  | 16.51 (14.42, 18.60) | 5.55 (3.18, 7.92)   | <0.0001 |
| <b>Quarter</b>  | <b>(p=0.6010)**</b> |                    |                    |         | <b>(p=0.5800)**</b>  |                      |                     |         |
| Q1 (Apr-Jun)    | 5.52 (4.53, 6.51)   | 8.92 (7.15, 10.69) | 3.40 (0.14, 6.66)  | 0.0412  | 10.79 (9.85, 11.74)  | 12.17 (11.11, 13.24) | 1.38 (-0.80, 3.56)  | 0.2142  |
| Q2 (Jul-Sep)    | 6.19 (5.18, 7.21)   | 7.47 (6.87, 8.07)  | 1.27 (0.11, 2.44)  | 0.0322  | 12.33 (11.01, 13.64) | 12.34 (11.58, 13.09) | 0.01 (-1.44, 1.45)  | 0.9915  |
| Q3 (Oct-Dec)    | 5.39 (4.66, 6.12)   | 7.02 (6.22, 7.82)  | 1.63 (0.51, 2.75)  | 0.0046  | 10.62 (9.46, 11.77)  | 11.80 (10.54, 13.07) | 1.19 (-0.52, 2.90)  | 0.1721  |
| Q4 (Jan-Mar)    | 5.76 (5.08, 6.43)   | 7.37 (6.16, 8.57)  | 1.61 (0.34, 2.88)  | 0.0133  | 10.82 (9.62, 12.03)  | 10.91 (10.11, 11.71) | 0.08 (-1.38, 1.55)  | 0.9093  |

\* 2020/21: first year of COVID-19 pandemic; 2019/20: preceding year.

\*\* Test for interaction testing to see if the differences in mean age vary according to the children's characteristic

1  
2  
3  
4 At national level, mean age at the first primary palate repair did not increase during 2020/21  
5  
6 (0.6 months, 95% CI: -0.2, 1.4) but there was some evidence of regional variation (p=0.0022)  
7  
8 with the largest increases in mean age being observed in the South-West (5.6 months; 95%  
9  
10 CI: 3.2 to 7.9) and North-West (2.6 months; 95% CI: 0.5, 4.6).  
11  
12  
13

14 There was an increase in the proportion of lip repairs carried out after the age of 6 months  
15  
16 from 19.4% (79/408; 95% CI: 15.6%, 23.5%) in 2019/20 to 57.9% (186/321; 95% CI: 52.3%,  
17  
18 63.4%) in 2020/21 (p < 0.0001). There was also a small but significant increase in the  
19  
20 proportion of palate repairs carried out after the age of 12 months from 22.5% (120/534; 95%  
21  
22 CI: 19.0%, 26.2%) in 2019/20 to 28.7% (130/453; 95% CI: 24.6%, 33.1%) in 2020/21 (p =  
23  
24 0.025).  
25  
26  
27

## 28 **DISCUSSION**

29  
30  
31 This national study using routinely collected administrative hospital data of children born  
32  
33 with an orofacial cleft in England found an 18% reduction in the number of first primary CLP  
34  
35 repair procedures during the first year of the COVID-19 pandemic, as well as a delay of 1.6  
36  
37 months in the timing of the first primary lip repair procedure, compared to the preceding  
38  
39 year. The largest difference was observed during the first quarter of the COVID-19 pandemic  
40  
41 period. Also, the delay in the timing of procedures varied across the country with children  
42  
43 residing in the South-West most affected.  
44  
45  
46  
47

48 The study has several strengths. First, the study population had excellent geographical  
49  
50 coverage of England, reflecting all NHS hospitals. Secondly, by using both diagnosis and  
51  
52 procedure codes to identify the study population, the impact of coding errors on the  
53  
54 differences reported will have been reduced. Third, the relatively large study population made  
55  
56 it possible to report differences in number and timing of first primary CLP repair surgeries  
57  
58 undertaken by patient characteristics, by region and quarterly period.  
59  
60

1  
2  
3 Limitations include that for some children data items on their specific diagnosis were missing  
4 and when differences were compared by the children's characteristics, our results were based  
5 only on a complete-case analysis. It is unclear what impact this may have on the results  
6 reported as it is not known whether children with missing data were more or less likely to  
7 have delayed surgery for CLP repair than those with complete data. The use of ICD-10 and  
8 OPCS-4 codes may not capture more nuanced clinical information about individual diagnoses  
9 and procedures.

10  
11 We showed that CLP repair surgery completely stopped in April and May 2020, which  
12 coincides with the start of the first national "lockdown" in England on 26<sup>th</sup> March 2020. This  
13 translated to a reduction in numbers of both primary lip repairs and primary palate repairs.  
14 Stakeholders will need to continue monitoring this as these reductions could have long term  
15 consequences (e.g. on speech development) and may have a time lag in their effect. The  
16 reduction in the number of first palate repair surgeries for children with additional congenital  
17 malformations was larger than for children without additional malformations, which may  
18 reflect deferred surgeries for children at higher risk of complications from COVID-19 (25).  
19 We also showed an increase in the age at first lip repair surgery, but no significant increase in  
20 the age at first palate repair. This may reflect clinical prioritisation of primary cleft palate  
21 repairs over cleft lip repairs. UK national guidance suggests that palate repair should be  
22 complete by 13 months of age (guidance palate repair at age 6 to 13 months) ( UK guidance;  
23 3-6 months of age for lip repairs)(26,27). However, we also showed that a significantly  
24 larger proportion of children had their first palate repair surgery after 12 months which might  
25 have long term consequences for education attainment as children who receive palate repairs  
26 after 13 months have been shown to have less favourable speech outcomes. (8,9)

27  
28 Our study indicated that there were regional variations in the impact of the COVID-19  
29 pandemic on the timing of first primary CLP repair procedures, which may reflect differences



1  
2  
3 in the regions' influence on management decision making, resources, fragility, and capacity  
4 for recovery. The delay of almost 6 months seen in one region with other regions showing  
5 hardly any delay in the timing of first primary CLP repair procedures requires further  
6 investigation.  
7  
8  
9  
10  
11  
12

13 This paper follows on from previous work which showed reductions in planned care during  
14 the pandemic and acts as a deeper dive into one specific type of planned care. (28) This work  
15 focuses on primary procedures which were given some prioritisation during the pandemic and  
16 as such might downplay its effect on wider cleft services. For example, secondary procedures  
17 such as Alveolar bone graft and secondary speech surgery are time sensitive but have less  
18 evidence supporting them. While the Federation of Specialist Surgical Associations Clinical  
19 Guide to Surgical Prioritisation during the COVID pandemic gave similar priority to primary  
20 and secondary cleft procedures, shop floor practicality may not necessarily have allowed  
21 equal treatment. (29) Further work needs to be done to understand the full effect of the  
22 pandemic on all cleft surgery especially the more temporarily sensitive secondary cleft  
23 procedures (alveolar bone grafting and secondary speech surgery).  
24  
25  
26  
27  
28  
29  
30  
31  
32  
33  
34  
35  
36  
37  
38

39 In conclusion, during the first year of the COVID-19 pandemic a larger proportion of  
40 children had their cleft repair surgery outside of the recommended timeframe (3 to 6 months  
41 for lip repair and 6 to 13 months for palate repair). Previous research has shown that late  
42 surgery may be associated with delays in speech development and the need for additional  
43 speech therapy.(8,9) Delayed surgery beyond 13 months is thought to affect articulation  
44 following cleft palate repair, and the resulting need for extra corrective speech therapy may  
45 contribute to additional absence from school, potentially affecting primary educational  
46 attainment.(7,30) Future research should therefore consider investigating the effect of delay  
47 in surgery on educational outcomes to model the long-term implications of the COVID  
48 pandemic.  
49  
50  
51  
52  
53  
54  
55  
56  
57  
58  
59  
60

**FUNDING:**

This project was funded by the National Institute for Health and Care Research (NIHR) Policy Research Programme. The views expressed are those of the author(s) and not necessarily those of the NIHR or the Department of Health and Social Care.

This research was supported in part by the NIHR Great Ormond Street Hospital Biomedical Research Centre and the Health Data Research UK (grant no: LOND1), which is funded by the UK Medical Research Council and eight other funders. RB is supported by a UKRI Innovation Fellowship funded by the Medical Research Council (grant number MR/S003797/1).

**AUTHOR CONTRIBUTIONS**

JVDM and MHP developed the research question. DE, LMGL and RB operationalised the research question jointly with JVDM and MHP using data available via UCL Child Health Informatics team. DE undertook the analysis and drafted the manuscript. KF, SB, JM and CR provided essential clinical and contextual input into the study design and analysis, and interpretation of the results. All authors provided oversight and input to the final manuscript.

**ACKNOWLEDGEMENTS**

We thank Professor Ruth Gilbert and Professor Katie Harron for their support of the ECHILD project.

**What is already known on this topic:**

- Surgical repair of cleft lip and palate (CLP) should promote optimal outcomes including feeding, speech and aesthetics, with enduring consequences for child development and education.
- Clinical guidelines advocate surgery for first repair of cleft lip in children aged 3-6 months and before age 13 months for cleft palate repair.
- The COVID-19 pandemic significantly disrupted planned healthcare, but the impact on the timing of surgery for primary repair of CLP is not known.

#### **What this study adds:**

- During the pandemic, over half of children with cleft lip and over one quarter with cleft palate exceeded the recommended age for first primary repair.
- Overall, the number of procedures for primary CLP repair during the first year of the COVID-19 pandemic was 18% lower than the prior year.
- First primary lip repair was delayed by an average of 1.6 months, with no evidence of a delay in primary palate repair at national level.

#### **How this study might affect research, practice or policy:**

- Services for children with CLP should be aware that targeted support may be required to mitigate the longer-term effects of surgical delays during the pandemic.
- Determining the impact of delays in primary CLP repair on child development and education outcomes is a research priority.
- Such research is needed both to support children affected by the pandemic and to inform the evidence-base for the optimal timing of CLP surgery.

#### **ETHICAL APPROVAL**

Ethical approval was not required for this study because only de-identified routinely collected data were analysed.

## CONFLICTS OF INTEREST

The authors have no conflicts of interest to declare

## DATA SHARING STATEMENT

Data are available on request from NHS Digital and may not be shared by the authors.

## REFERENCES

1. Cleft Lip and Palate Association (CLAPA), Cleft Registry and Audit Network (CRANE). CRANE 2020 Annual Report: Summary of findings for patients and parents/carers on children born with a cleft in England, Wales and Northern Ireland between January 2000 and December 2019. [Internet]. 2021 [cited 2022 Feb 3]. Available from: [https://www.crane-database.org.uk/content/uploads/2021/03/CRANE-2020-AR\\_Patients-Parents-Carers-Summary\\_V1.pdf](https://www.crane-database.org.uk/content/uploads/2021/03/CRANE-2020-AR_Patients-Parents-Carers-Summary_V1.pdf)
2. Fitzsimons KJ, Copley LP, Van Der Meulen JH, Panagamuwa C, Deacon SA. Grommet Surgery in Children with Orofacial Clefts in England. *Cleft Palate Craniofac J*. 2017 Jan 1;54(1):80–9. <https://doi.org/10.1597/15-047>
3. Mildinhall S. Speech and Language in the Patient with Cleft Palate. *Cleft Lip Palate*. 2012;16:137–46. <https://doi.org/10.1159/000337668>
4. Stock N, Rumsey N. Living with a Cleft: Psychological Challenges, Support and Intervention. In: *Cleft Lip and Palate: Diagnosis and Management*. 2013. [https://doi.org/10.1007/978-3-642-30770-6\\_45](https://doi.org/10.1007/978-3-642-30770-6_45)

- 1  
2  
3 5. Gallagher ER, Collett BR. Neurodevelopmental and Academic Outcomes in Children  
4 With Orofacial Clefts: A Systematic Review. *Pediatrics*. 2019 Jul 1;144(1):e20184027.  
5  
6 <https://doi.org/10.1542/peds.2018-4027>  
7  
8
- 9  
10 6. Fitzsimons KJ, Copley LP, Setakis E, Charman SC, Deacon SA, Dearden L, et al.  
11 Early academic achievement in children with isolated clefts: a population-based study in  
12 England. *Arch Dis Child*. 2018 Apr 1;103(4):356–62. [https://doi.org/10.1136/archdischild-](https://doi.org/10.1136/archdischild-2017-313777)  
13 [2017-313777](https://doi.org/10.1136/archdischild-2017-313777)  
14  
15
- 16 7. Fitzsimons KJ, Deacon SA, Copley LP, Park MH, Medina J, van der Meulen JH.  
17 School absence and achievement in children with isolated orofacial clefts. *Arch Dis Child*.  
18 2021 Feb 1;106(2):154–9. <https://doi.org/10.1136/archdischild-2020-319123>  
19  
20
- 21 8. Shaffer AD, Ford MD, Losee JE, Goldstein J, Costello BJ, Grunwaldt LJ, et al. The  
22 Association Between Age at Palatoplasty and Speech and Language Outcomes in Children  
23 With Cleft Palate: An Observational Chart Review Study. *Cleft Palate Craniofac J*. 2020 Feb  
24 1;57(2):148–60. <https://doi.org/10.1177/1055665619882566>  
25  
26
- 27 9. Lindeborg MM, Shakya P, Rai SM, Shaye DA. Optimizing speech outcomes for cleft  
28 palate. *Curr Opin Otolaryngol Head Neck Surg*. 2020 Aug;28(4):206–11.  
29 <https://doi.org/10.1097/MOO.0000000000000635>  
30  
31
- 32 10. Jiri B, Jana V, Michal J, Jiri K, Dana H, Miroslav T, et al. Successful early neonatal  
33 repair of cleft lip within first 8 days of life. *Int J Pediatr Otorhinolaryngol*. 2012 Nov  
34 1;76(11):1616–26. <https://doi.org/10.1016/j.ijporl.2012.07.031>  
35  
36
- 37 11. Hammoudeh JA, Imahiyerobo TA, Liang F, Fahradyan A, Urbinelli L, Lau J, et al.  
38 Early Cleft Lip Repair Revisited: A Safe and Effective Approach Utilizing a  
39 Multidisciplinary Protocol. *Plast Reconstr Surg – Glob Open*. 2017 Jun;5(6):e1340.  
40 <https://doi.org/10.1097/GOX.0000000000001340>  
41  
42  
43  
44  
45  
46  
47  
48  
49  
50  
51  
52  
53  
54  
55  
56  
57  
58  
59  
60

- 1  
2  
3 12. Petráčková I, Zach J, Borský J, Černý M, Hacklová R, Tvrdek M, et al. Early and late  
4 operation of cleft lip and intelligence quotient and psychosocial development in 3–7years.  
5  
6 Early Hum Dev. 2015 Feb 1;91(2):149–52. <https://doi.org/10.1016/j.earlhumdev.2014.12.015>  
7  
8  
9  
10  
11 13. Isba R, Edge R, Jenner R, Broughton E, Francis N, Butler J. Where have all the  
12 children gone? Decreases in paediatric emergency department attendances at the start of the  
13 COVID-19 pandemic of 2020. Arch Dis Child. 2020 Jul 1;105(7):704–704.  
14  
15  
16  
17 <https://doi.org/10.1136/archdischild-2020-319385>  
18  
19  
20  
21 14. Bottle A, Aylin P, Warner M, Propper C, Stoye G, Burn S. What happened to English  
22 NHS hospital activity during the COVID-19 pandemic? [Internet]. 2021 May [cited 2021  
23 Nov 30]. Available from: <https://ifs.org.uk/publications/15432>  
24  
25  
26  
27  
28 15. Timeline of UK government coronavirus lockdowns and restrictions [Internet]. The  
29 Institute for Government. 2021 [cited 2022 Sep 5]. Available from:  
30  
31  
32 <https://www.instituteforgovernment.org.uk/charts/uk-government-coronavirus-lockdowns>  
33  
34  
35  
36 16. Herbert A, Wijlaars L, Zylbersztejn A, Cromwell D, Hardelid P. Data Resource  
37 Profile: Hospital Episode Statistics Admitted Patient Care (HES APC). Int J Epidemiol. 2017  
38 Aug 1;46(4):1093–1093i. <https://doi.org/10.1093/ije/dyx015>  
39  
40  
41  
42  
43 17. WHO | ICD-10 online versions [Internet]. WHO. World Health Organization; [cited  
44 2020 Apr 20]. Available from: <http://www.who.int/classifications/icd/icdonlineversions/en/>  
45  
46  
47  
48 18. OPCS classification of interventions and procedures. Version 4.8. Version 4.8 (2017).  
49 London: Stationery Office; 2017. Available from: [https://digital.nhs.uk/data-and-  
50 information/information-standards/information-standards-and-data-collections-including-  
51 extractions/publications-and-notifications/standards-and-collections/dapb0084-opcs-  
52 classification-of-interventions-and-procedures](https://digital.nhs.uk/data-and-information/information-standards/information-standards-and-data-collections-including-extractions/publications-and-notifications/standards-and-collections/dapb0084-opcs-classification-of-interventions-and-procedures)  
53  
54  
55  
56  
57  
58  
59  
60

- 1  
2  
3 19. Harron K, Gilbert R, Cromwell D, Meulen J van der. Linking Data for Mothers and  
4 Babies in De-Identified Electronic Health Data. PLOS ONE. 2016 Oct 20;11(10):e0164667.  
5  
6 <https://doi.org/10.1371/journal.pone.0164667>  
7  
8  
9  
10  
11 20. Fitzsimons K, Hamilton M, van der Meulen J, Medina J, Wahedally M, Park M, et al.  
12 Range and Frequency of Congenital Malformations Among Children With Cleft Lip and/or  
13 Palate. Cleft Palate Craniofac J. 2022 Apr 5;10556656221089160.  
14  
15 <https://doi.org/10.1177/10556656221089160>  
16  
17  
18  
19  
20  
21 21. Zylbersztejn A, Verfürden M, Hardelid P, Gilbert R, Wijlaars L. Phenotyping  
22 congenital anomalies in administrative hospital records. Paediatr Perinat Epidemiol. 2020  
23 Jan;34(1):21–8. <https://doi.org/10.1111/ppe.12627>  
24  
25  
26  
27  
28 22. Office of the Deputy Prime Minister, Neighbourhood Renewal Unit. The English  
29 indices of deprivation 2004. [Internet]. London: Office of the Deputy Prime Minister; 2004.  
30 Available from:  
31  
32 [https://www.brent.gov.uk/media/323946/SD%2062b%20Indices%20of%20multiple%20depre  
33  
34  
35  
36  
37  
38  
39  
40  
41 23. Hilbe JM. Modeling Count Data \[Internet\]. Cambridge: Cambridge University Press;  
42 2014 \[cited 2022 Sep 5\]. Available from: \[https://www.cambridge.org/core/books/modeling-  
43  
44  
45  
46  
47  
48  
49  
50  
51 24. StataCorp. Stata Statistical Software. College Station, TX: StataCorp LLC; 2017.  
52  
53  
54 25. COVID-19: guidance on protecting people defined on medical grounds as extremely  
55 vulnerable \\[Internet\\]. GOV.UK. \\[cited 2022 Dec 16\\]. Available from:  
56  
57  
58  
59  
60 \\[https://www.gov.uk/government/publications/guidance-on-shielding-and-protecting-  
extremely-vulnerable-persons-from-covid-19\\]\\(https://www.gov.uk/government/publications/guidance-on-shielding-and-protecting-extremely-vulnerable-persons-from-covid-19\\)\]\(https://www.cambridge.org/core/books/modeling-count-data/BFEB3985905CA70523D9F98DA8E64D08\)](https://www.brent.gov.uk/media/323946/SD%2062b%20Indices%20of%20multiple%20deprivation%202004.pdf)

- 1  
2  
3 26. Federation of Surgical Specialty Association. Clinical Guide to Surgical Prioritisation  
4 During the Coronavirus Pandemic [Internet]. [cited 2022 Sep 5]. Available from:  
5  
6 [https://fssa.org.uk/\\_userfiles/pages/files/covid19/prioritisation\\_master\\_250920.pdf](https://fssa.org.uk/_userfiles/pages/files/covid19/prioritisation_master_250920.pdf)  
7  
8  
9  
10 27. Resumption of Cleft Services [Internet]. CLAPA. [cited 2022 Feb 3]. Available from:  
11  
12 <https://www.clapa.com/news-item/resumption-of-cleft-services/>  
13  
14  
15 28. Etoori D, Harron KL, Grath-Lone LM, Verfürden ML, Gilbert R, Blackburn R.  
16 Reductions in hospital care among clinically vulnerable children aged 0–4 years during the  
17 COVID-19 pandemic. Arch Dis Child [Epub ahead of print]. 2022 Jun 20 [cited 2022 Sep 5];  
18  
19 <https://doi.org/10.1136/archdischild-2021-323681>  
20  
21  
22 29. Clinical Guide to Surgical Prioritisation During the Coronavirus Pandemic [Internet].  
23 FSSA. [cited 2022 Dec 15]. Available from: [https://fssa.org.uk/covid-19\\_documents.aspx](https://fssa.org.uk/covid-19_documents.aspx)  
24  
25  
26 30. Russell CJH, Fitzsimons KJ, Britton L, Van Eeden S, Butterworth S, Wahedally  
27 MHA, Park MH, Medina J, van der Meulen J, What Is The Optimal Timing Of Palate Repair  
28 For Speech Outcomes? Analysis Of Two Linked National Databases In England. [Oral  
29 presentation] CLEFT 2022 conference  
30  
31  
32  
33  
34  
35  
36  
37  
38  
39  
40  
41  
42  
43  
44  
45  
46  
47  
48  
49  
50  
51  
52  
53  
54  
55  
56  
57  
58  
59  
60



1  
2  
3 **Figure 1:** Monthly numbers of first primary cleft lip repair and palate repair procedures in  
4 the first year of the COVID-19 period (between April 2020 and March 2021; red line) and the  
5 preceding year (between April 2019 and March 2020; blue line).  
6  
7  
8  
9

10  
11  
12 \* Grey lines represent 5-year average (14/15 to 18/19) for historic comparison. Shaded areas  
13 represent lockdown periods (Lockdown 1: March 23 – June 23, 2020; Lockdown 2:  
14 November 5 – December 6, 2020; Lockdown 3: January 1 – March 8, 2021). CLP – Cleft lip  
15 and palate  
16  
17  
18  
19  
20  
21  
22  
23  
24  
25  
26  
27  
28  
29  
30  
31  
32  
33  
34  
35  
36  
37  
38  
39  
40  
41  
42  
43  
44  
45  
46  
47  
48  
49  
50  
51  
52  
53  
54  
55  
56  
57  
58  
59  
60

1  
2  
3 **Figure 2:** Mean age at the first primary cleft lip and palate repair procedure in the first year of the COVID-19 pandemic (between April 2020  
4 and March 2021; red square) and the preceding year (between April 2019 and March 2020; blue circle) with 95% confidence intervals.  
5  
6  
7  
8  
9

10  
11 Q1 – April – June; Q2 – July – September; Q3 – October – December; Q4 – January – March.  
12  
13  
14  
15  
16  
17  
18  
19  
20  
21  
22  
23  
24  
25  
26  
27  
28  
29  
30  
31  
32  
33  
34  
35  
36  
37  
38  
39  
40  
41  
42  
43  
44  
45  
46

1  
2  
3  
4  
5  
6  
7  
8  
9  
10  
11  
12  
13  
14  
15  
16  
17  
18  
19  
20  
21  
22  
23  
24  
25  
26  
27  
28  
29  
30  
31  
32  
33  
34  
35  
36  
37  
38  
39  
40  
41  
42  
43  
44  
45  
46  
47  
48  
49  
50  
51  
52  
53  
54  
55  
56  
57  
58  
59  
60

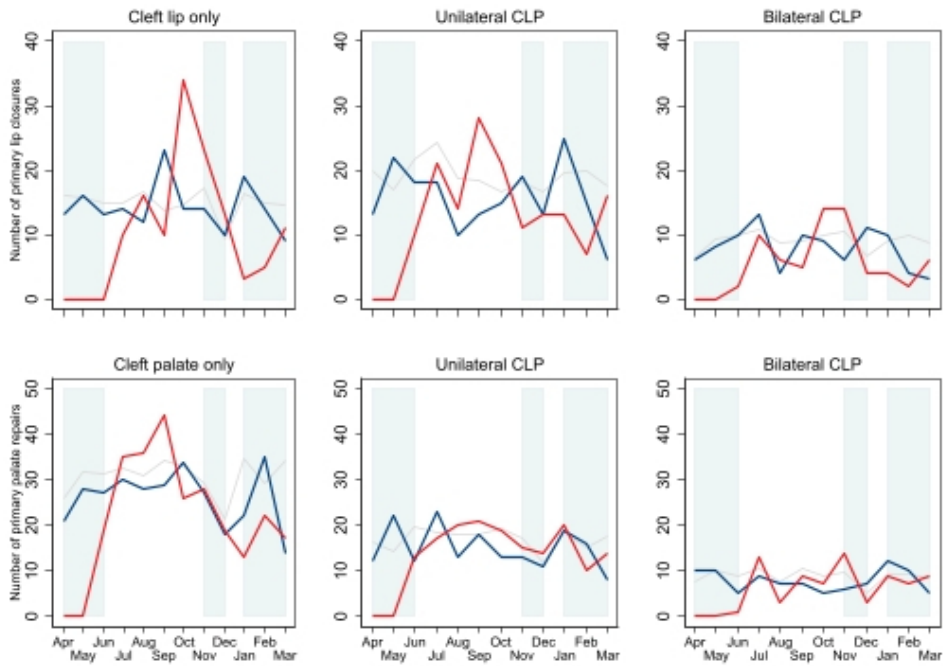

44x32mm (300 x 300 DPI)

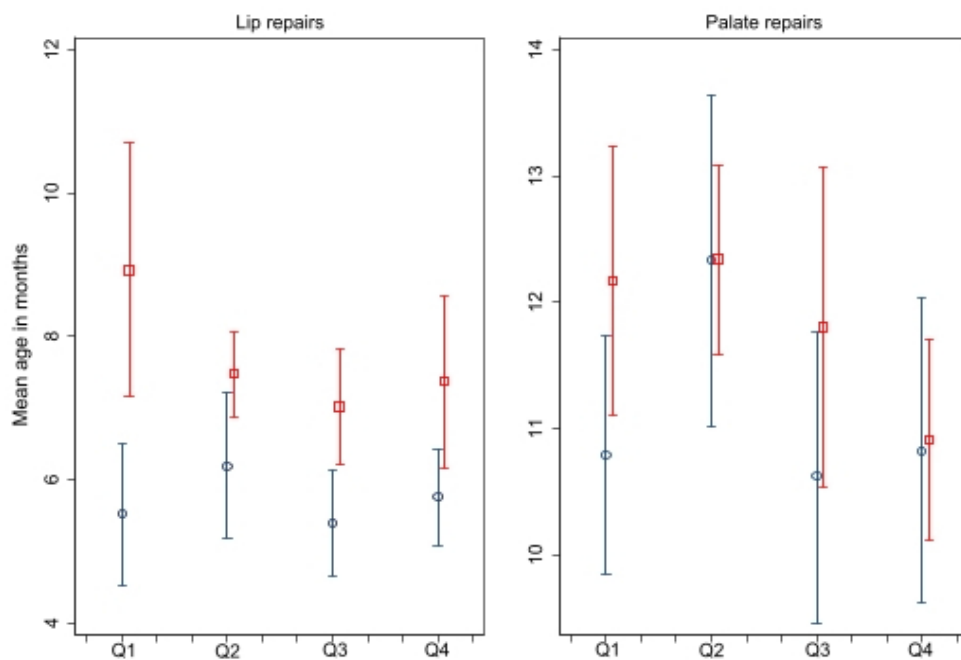

44x32mm (300 x 300 DPI)

SUPPLEMENTARY MATERIALS

Supplementary Figure 1: Flow chart showing inclusion criteria into the study

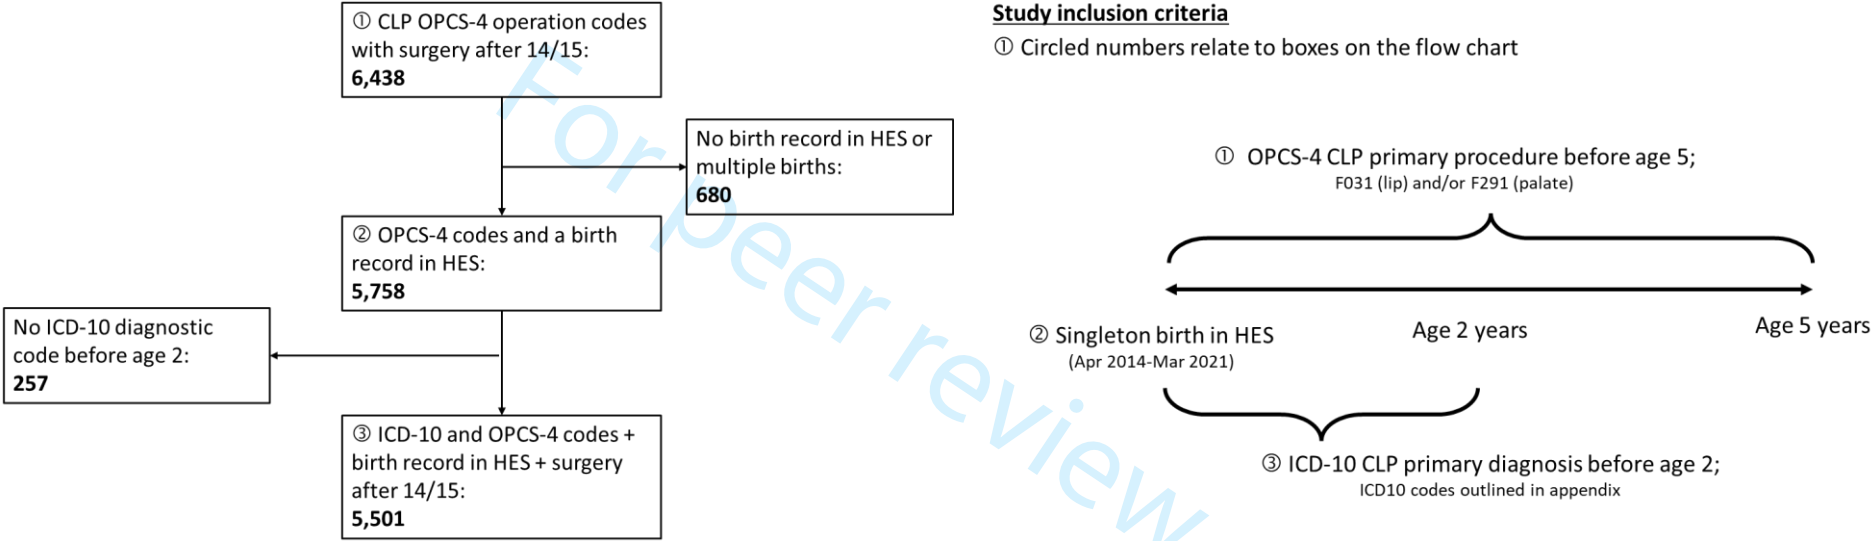

1  
2  
3 **Supplementary information 1: OPCS-4 CLP surgery procedure code lists**  
4  
5

6

| OPCS-4 code | Surgery type                 |
|-------------|------------------------------|
| F031        | Primary closure of cleft lip |
| F291        | Primary palate repair        |

7  
8  
9  
10  
11  
12  
13  
14  
15  
16  
17  
18

19 **Supplementary information 2: Cleft lip and palate ICD-10 codes**  
20  
21

22

| ICD-10 codes           | Cleft type                      |
|------------------------|---------------------------------|
| Q35x                   | Cleft lip                       |
| Q36x                   | Cleft palate                    |
| Q371, Q373, Q375, Q379 | Unilateral cleft lip and palate |
| Q370, Q372, Q374, Q378 | Bilateral cleft lip and palate  |

23  
24  
25  
26  
27  
28  
29  
30  
31  
32  
33  
34  
35  
36  
37  
38  
39  
40  
41  
42  
43  
44  
45  
46

1  
2  
3  
4  
5  
6  
7  
8  
9  
10  
11  
12  
13  
14  
15  
16  
17  
18  
19  
20  
21  
22  
23  
24  
25  
26  
27  
28  
29  
30  
31  
32  
33  
34  
35  
36  
37  
38  
39  
40  
41  
42  
43  
44  
45  
46

**Supplementary information 3: Congenital anomalies code list**

---

| Code                                                       | Description                                                   |
|------------------------------------------------------------|---------------------------------------------------------------|
| <i>Congenital malformations of the nervous system</i>      |                                                               |
| Q00                                                        | Anencephaly and similar malformations                         |
| Q01                                                        | Encephalocele                                                 |
| Q02                                                        | Microcephaly                                                  |
| Q03                                                        | Congenital hydrocephalus                                      |
| Q04                                                        | Other congenital malformations of brain                       |
| Q05                                                        | Spina bifida                                                  |
| Q06                                                        | Other congenital malformations of spinal cord                 |
| Q07                                                        | Other congenital malformations of nervous system              |
| <i>Congenital malformations of eye, ear, face and neck</i> |                                                               |
| Q10                                                        | Congenital ptosis                                             |
| Q11                                                        | Anophthalmos, microphthalmos and macrophthalmos               |
| Q12                                                        | Congenital lens malformations                                 |
| Q13                                                        | Congenital malformations of anterior segment of eye           |
| Q14                                                        | Congenital malformations of posterior segment of eye          |
| Q15                                                        | Other congenital malformations of eye                         |
| Q16                                                        | Congenital malformations of ear causing impairment of hearing |
| Q17                                                        | Other congenital malformations of ear                         |

For peer review only

- 1  
2  
3 Q18 Other congenital malformations of face and neck  
4  
5 

---

*Congenital malformations of the circulatory system*  
6  
7 Q20 Congenital malformations of cardiac chambers and connections  
8 Q21 Congenital malformations of cardiac septa  
9  
10 Q22 Congenital malformations of pulmonary and tricuspid valves  
11 Q23 Congenital malformations of aortic and mitral valves  
12  
13 Q24 Other congenital malformations of heart  
14  
15 Q25 Congenital malformations of great arteries  
16  
17 Q26 Congenital malformations of great veins  
18  
19 Q27 Other congenital malformations of peripheral vascular system  
20  
21 Q28 Other congenital malformations of circulatory system  
22 

---

*Congenital malformations of the respiratory system*  
23  
24 Q30 Congenital malformations of nose  
25 Q31 Congenital malformations of larynx  
26  
27 Q32 Congenital malformations of trachea and bronchus  
28  
29 Q33 Congenital malformations of lung  
30  
31 Q34 Other congenital malformations of respiratory system  
32 

---

*Other congenital malformations of the digestive system*  
33  
34 Q38 Other congenital malformations of tongue, mouth and pharynx  
35 Q39 Congenital malformations of oesophagus  
36  
37 Q40 Other congenital malformations of upper alimentary tract  
38  
39 Q41 Congenital absence, atresia and stenosis of small intestine  
40  
41  
42  
43  
44  
45  
46



- 1  
2  
3 Q42 Congenital absence, atresia and stenosis of large intestine  
4  
5 Q43 Other congenital malformations of intestine  
6  
7 Q44 Congenital malformations of gallbladder, bile ducts and liver  
8  
9 Q45 Other congenital malformations of digestive system  
10  
11 

---

*Congenital malformations of the genital organs*  
12 Q50 Congenital malformations of ovaries, fallopian tubes and broad ligaments  
13 Q51 Congenital malformations of uterus and cervix  
14 Q52 Other congenital malformations of female genitalia  
15  
16 Q53 Undescended testicle  
17  
18 Q54 Hypospadias  
19  
20 Q55 Other congenital malformations of male genital organs  
21  
22 Q56 Indeterminate sex and pseudohermaphroditism  
23  
24 

---

*Congenital malformations of the urinary system*  
25 Q60 Renal agenesis and other reduction defects of kidney  
26 Q61 Cystic kidney disease  
27  
28 Q62 Congenital obstructive defects of renal pelvis and congenital malformations of ureter  
29  
30 Q63 Other congenital malformations of kidney  
31  
32 Q64 Other congenital malformations of urinary system  
33  
34 

---

*Congenital malformations and deformations of the musculoskeletal system*  
35 Q65 Congenital deformities of hip  
36 Q66 Congenital deformities of feet  
37  
38 Q67 Congenital musculoskeletal deformities of head, face, spine and chest  
39  
40  
41  
42  
43  
44  
45  
46

- 1  
2  
3 Q68 Other congenital musculoskeletal deformities  
4  
5 Q69 Polydactyly  
6  
7 Q70 Syndactyly  
8  
9 Q71 Reduction defects of upper limb  
10  
11 Q72 Reduction defects of lower limb  
12  
13 Q73 Reduction defects of unspecified limb  
14  
15 Q74 Other congenital malformations of limb(s)  
16  
17 Q75 Other congenital malformations of skull and face bones  
18  
19 Q76 Congenital malformations of spine and bony thorax  
20  
21 Q77 Osteochondrodysplasia with defects of growth of tubular bones and spine  
22  
23 Q78 Other osteochondrodysplasias  
24  
25 Q79 Congenital malformations of the musculoskeletal system, not elsewhere classified  
26  
27 

---

*Other congenital malformations*  
28  
29 Q80 Congenital ichthyosis  
30  
31 Q81 Epidermolysis bullosa  
32  
33 Q82 Other congenital malformations of skin  
34  
35 Q83 Congenital malformations of breast  
36  
37 Q84 Other congenital malformations of integument  
38  
39 Q85 Phakomatoses, not elsewhere classified  
40  
41 Q86 Congenital malformation syndromes due to known exogenous causes, not elsewhere classified  
42  
43 Q87 Other specified congenital malformation syndromes affecting multiple systems  
44  
45 Q89 Other congenital malformations, not elsewhere classified  
46

1  
2  
3  
4  
5  
6  
7  
8  
9  
10  
11  
12  
13  
14  
15  
16  
17  
18  
19  
20  
21  
22  
23  
24  
25  
26  
27  
28  
29  
30  
31  
32  
33  
34  
35  
36  
37  
38  
39  
40  
41  
42  
43  
44  
45  
46

---

*Chromosomal abnormalities, not elsewhere classified*

- Q90 Down syndrome
  - Q91 Edwards syndrome and Patau syndrome
  - Q92 Other trisomies and partial trisomies of the autosomes, not elsewhere classified
  - Q93 Monosomies and deletions from the autosomes, not elsewhere classified
  - Q95 Balanced rearrangements and structural markers, not elsewhere classified
  - Q96 Turner syndrome
  - Q97 Other sex chromosome abnormalities, female phenotype, not elsewhere classified
  - Q98 Other sex chromosome abnormalities, male phenotype, not elsewhere classified
  - Q99 Other chromosome abnormalities, not elsewhere classified
-

## STROBE Statement—checklist of items that should be included in reports of observational studies

|                              | Item No | Recommendation                                                                                                                                                                                                                                                                                                                                                                                                                                                         | Page No |
|------------------------------|---------|------------------------------------------------------------------------------------------------------------------------------------------------------------------------------------------------------------------------------------------------------------------------------------------------------------------------------------------------------------------------------------------------------------------------------------------------------------------------|---------|
| <b>Title and abstract</b>    | 1       | (a) Indicate the study's design with a commonly used term in the title or the abstract                                                                                                                                                                                                                                                                                                                                                                                 | 1       |
|                              |         | (b) Provide in the abstract an informative and balanced summary of what was done and what was found                                                                                                                                                                                                                                                                                                                                                                    | 2-3     |
| <b>Introduction</b>          |         |                                                                                                                                                                                                                                                                                                                                                                                                                                                                        |         |
| Background/rationale         | 2       | Explain the scientific background and rationale for the investigation being reported                                                                                                                                                                                                                                                                                                                                                                                   | 3-4     |
| Objectives                   | 3       | State specific objectives, including any prespecified hypotheses                                                                                                                                                                                                                                                                                                                                                                                                       | 4       |
| <b>Methods</b>               |         |                                                                                                                                                                                                                                                                                                                                                                                                                                                                        |         |
| Study design                 | 4       | Present key elements of study design early in the paper                                                                                                                                                                                                                                                                                                                                                                                                                | 5       |
| Setting                      | 5       | Describe the setting, locations, and relevant dates, including periods of recruitment, exposure, follow-up, and data collection                                                                                                                                                                                                                                                                                                                                        | 5-6     |
| Participants                 | 6       | (a) <i>Cohort study</i> —Give the eligibility criteria, and the sources and methods of selection of participants. Describe methods of follow-up<br><i>Case-control study</i> —Give the eligibility criteria, and the sources and methods of case ascertainment and control selection. Give the rationale for the choice of cases and controls<br><i>Cross-sectional study</i> —Give the eligibility criteria, and the sources and methods of selection of participants | 5-6     |
|                              |         | (b) <i>Cohort study</i> —For matched studies, give matching criteria and number of exposed and unexposed<br><i>Case-control study</i> —For matched studies, give matching criteria and the number of controls per case                                                                                                                                                                                                                                                 |         |
| Variables                    | 7       | Clearly define all outcomes, exposures, predictors, potential confounders, and effect modifiers. Give diagnostic criteria, if applicable                                                                                                                                                                                                                                                                                                                               | 5-6     |
| Data sources/<br>measurement | 8*      | For each variable of interest, give sources of data and details of methods of assessment (measurement). Describe comparability of assessment methods if there is more than one group                                                                                                                                                                                                                                                                                   | 4-5     |
| Bias                         | 9       | Describe any efforts to address potential sources of bias                                                                                                                                                                                                                                                                                                                                                                                                              | 5       |
| Study size                   | 10      | Explain how the study size was arrived at                                                                                                                                                                                                                                                                                                                                                                                                                              | 5       |
| Quantitative variables       | 11      | Explain how quantitative variables were handled in the analyses. If applicable, describe which groupings were chosen and why                                                                                                                                                                                                                                                                                                                                           | 6       |
| Statistical methods          | 12      | (a) Describe all statistical methods, including those used to control for confounding                                                                                                                                                                                                                                                                                                                                                                                  | 6       |
|                              |         | (b) Describe any methods used to examine subgroups and interactions                                                                                                                                                                                                                                                                                                                                                                                                    | 6       |
|                              |         | (c) Explain how missing data were addressed                                                                                                                                                                                                                                                                                                                                                                                                                            | 7       |
|                              |         | (d) <i>Cohort study</i> —If applicable, explain how loss to follow-up was addressed<br><i>Case-control study</i> —If applicable, explain how matching of cases and controls was addressed<br><i>Cross-sectional study</i> —If applicable, describe analytical methods taking account of sampling strategy                                                                                                                                                              | 6       |
|                              |         | (e) Describe any sensitivity analyses                                                                                                                                                                                                                                                                                                                                                                                                                                  |         |

Continued on next page

1  
2  
3  
4  
5  
6  
7  
8  
9  
10  
11  
12  
13  
14  
15  
16  
17  
18  
19  
20  
21  
22  
23  
24  
25  
26  
27  
28  
29  
30  
31  
32  
33  
34  
35  
36  
37  
38  
39  
40  
41  
42  
43  
44  
45  
46  
47  
48  
49  
50  
51  
52  
53  
54  
55  
56  
57  
58  
59  
60

| <b>Results</b>           |     |                                                                                                                                                                                                                                                                                                                                                                                                               |                 |
|--------------------------|-----|---------------------------------------------------------------------------------------------------------------------------------------------------------------------------------------------------------------------------------------------------------------------------------------------------------------------------------------------------------------------------------------------------------------|-----------------|
| Participants             | 13* | (a) Report numbers of individuals at each stage of study—eg numbers potentially eligible, examined for eligibility, confirmed eligible, included in the study, completing follow-up, and analysed<br>(b) Give reasons for non-participation at each stage<br>(c) Consider use of a flow diagram                                                                                                               | 7 & Suppl Fig 1 |
| Descriptive data         | 14* | (a) Give characteristics of study participants (eg demographic, clinical, social) and information on exposures and potential confounders<br>(b) Indicate number of participants with missing data for each variable of interest<br>(c) <i>Cohort study</i> —Summarise follow-up time (eg, average and total amount)                                                                                           | Table 1         |
| Outcome data             | 15* | <i>Cohort study</i> —Report numbers of outcome events or summary measures over time<br><i>Case-control study</i> —Report numbers in each exposure category, or summary measures of exposure<br><i>Cross-sectional study</i> —Report numbers of outcome events or summary measures                                                                                                                             | 7, T1           |
| Main results             | 16  | (a) Give unadjusted estimates and, if applicable, confounder-adjusted estimates and their precision (eg, 95% confidence interval). Make clear which confounders were adjusted for and why they were included<br>(b) Report category boundaries when continuous variables were categorized<br>(c) If relevant, consider translating estimates of relative risk into absolute risk for a meaningful time period | 7-10<br>7-10    |
| Other analyses           | 17  | Report other analyses done—eg analyses of subgroups and interactions, and sensitivity analyses                                                                                                                                                                                                                                                                                                                | 7-10            |
| <b>Discussion</b>        |     |                                                                                                                                                                                                                                                                                                                                                                                                               |                 |
| Key results              | 18  | Summarise key results with reference to study objectives                                                                                                                                                                                                                                                                                                                                                      | 14              |
| Limitations              | 19  | Discuss limitations of the study, taking into account sources of potential bias or imprecision. Discuss both direction and magnitude of any potential bias                                                                                                                                                                                                                                                    | 15              |
| Interpretation           | 20  | Give a cautious overall interpretation of results considering objectives, limitations, multiplicity of analyses, results from similar studies, and other relevant evidence                                                                                                                                                                                                                                    | 15-16           |
| Generalisability         | 21  | Discuss the generalisability (external validity) of the study results                                                                                                                                                                                                                                                                                                                                         | 14              |
| <b>Other information</b> |     |                                                                                                                                                                                                                                                                                                                                                                                                               |                 |
| Funding                  | 22  | Give the source of funding and the role of the funders for the present study and, if applicable, for the original study on which the present article is based                                                                                                                                                                                                                                                 | 17              |

\*Give information separately for cases and controls in case-control studies and, if applicable, for exposed and unexposed groups in cohort and cross-sectional studies.

**Note:** An Explanation and Elaboration article discusses each checklist item and gives methodological background and published examples of transparent reporting. The STROBE checklist is best used in conjunction with this article (freely available on the Web sites of PLoS Medicine at <http://www.plosmedicine.org/>, Annals of Internal Medicine at <http://www.annals.org/>, and Epidemiology at <http://www.epidem.com/>). Information on the STROBE Initiative is available at [www.strobe-statement.org](http://www.strobe-statement.org).

# BMJ Open

## Number and timing of primary cleft lip and palate repair surgeries in England: whole nation study of electronic health records before and during the COVID-19 pandemic.

|                                 |                                                                                                                                                                                                                                                                                                                                                                                                                                                                                                                                                                                                                                      |
|---------------------------------|--------------------------------------------------------------------------------------------------------------------------------------------------------------------------------------------------------------------------------------------------------------------------------------------------------------------------------------------------------------------------------------------------------------------------------------------------------------------------------------------------------------------------------------------------------------------------------------------------------------------------------------|
| Journal:                        | <i>BMJ Open</i>                                                                                                                                                                                                                                                                                                                                                                                                                                                                                                                                                                                                                      |
| Manuscript ID                   | bmjopen-2023-071973.R1                                                                                                                                                                                                                                                                                                                                                                                                                                                                                                                                                                                                               |
| Article Type:                   | Original research                                                                                                                                                                                                                                                                                                                                                                                                                                                                                                                                                                                                                    |
| Date Submitted by the Author:   | 20-Apr-2023                                                                                                                                                                                                                                                                                                                                                                                                                                                                                                                                                                                                                          |
| Complete List of Authors:       | Etoori, David; University College London Institute of Health Informatics Park, Min Hae; London School of Hygiene & Tropical Medicine<br>Blackburn, Ruth; University College London Institute of Health Informatics<br>Fitzsimons, Kate; Royal College of Surgeons of England<br>Butterworth, Sophie; Royal College of Surgeons of England<br>Medina, Jibby; Royal College of Surgeons of England, Clinical Effectiveness Unit<br>Mc Grath-Lone, Louise; University College London Institute of Education<br>Russell, Craig; Queen Elizabeth University Hospital<br>van der Meulen, Jan; London School of Hygiene & Tropical Medicine |
| <b>Primary Subject Heading</b>: | Surgery                                                                                                                                                                                                                                                                                                                                                                                                                                                                                                                                                                                                                              |
| Secondary Subject Heading:      | Epidemiology                                                                                                                                                                                                                                                                                                                                                                                                                                                                                                                                                                                                                         |
| Keywords:                       | COVID-19, Paediatric surgery < SURGERY, EPIDEMIOLOGY, PAEDIATRIC SURGERY                                                                                                                                                                                                                                                                                                                                                                                                                                                                                                                                                             |
|                                 |                                                                                                                                                                                                                                                                                                                                                                                                                                                                                                                                                                                                                                      |

SCHOLARONE™  
Manuscripts

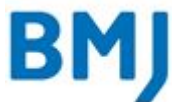

I, the Submitting Author has the right to grant and does grant on behalf of all authors of the Work (as defined in the below author licence), an exclusive licence and/or a non-exclusive licence for contributions from authors who are: i) UK Crown employees; ii) where BMJ has agreed a CC-BY licence shall apply, and/or iii) in accordance with the terms applicable for US Federal Government officers or employees acting as part of their official duties; on a worldwide, perpetual, irrevocable, royalty-free basis to BMJ Publishing Group Ltd ("BMJ") its licensees and where the relevant Journal is co-owned by BMJ to the co-owners of the Journal, to publish the Work in this journal and any other BMJ products and to exploit all rights, as set out in our [licence](#).

The Submitting Author accepts and understands that any supply made under these terms is made by BMJ to the Submitting Author unless you are acting as an employee on behalf of your employer or a postgraduate student of an affiliated institution which is paying any applicable article publishing charge ("APC") for Open Access articles. Where the Submitting Author wishes to make the Work available on an Open Access basis (and intends to pay the relevant APC), the terms of reuse of such Open Access shall be governed by a Creative Commons licence – details of these licences and which [Creative Commons](#) licence will apply to this Work are set out in our licence referred to above.

Other than as permitted in any relevant BMJ Author's Self Archiving Policies, I confirm this Work has not been accepted for publication elsewhere, is not being considered for publication elsewhere and does not duplicate material already published. I confirm all authors consent to publication of this Work and authorise the granting of this licence.

**Title:** Number and timing of primary cleft lip and palate repair surgeries in England: whole nation study of electronic health records before and during the COVID-19 pandemic.

**Authors:** David Etoori<sup>1</sup>, Min Hae Park<sup>2</sup>, Ruth Blackburn<sup>1\*</sup>, Kate Fitzsimons,<sup>3</sup> Sophie Butterworth,<sup>3</sup> Jibby Medina<sup>3</sup>, Louise Mc Grath-Lone<sup>1</sup>, Craig Russell<sup>4</sup>, Jan Van Der Meulen<sup>2</sup>

**Affiliations:**

1. University College London Institute of Health Informatics, 222 Euston Road, London, NW1 2DA, UK.
2. London School of Hygiene and Tropical Medicine, Keppel Street, London, WC1E 7HT, UK.
3. Clinical Effectiveness Unit, Royal College of Surgeons of England, 38 – 43 Lincoln's Inn Fields, London, UK.
4. Royal Hospital for Children, Queen Elizabeth University Hospital, Glasgow, UK

**\* Corresponding author:**

Dr Ruth Blackburn, 222 Euston Road, London, NW1 2DA, UK, Email:

[r.blackburn@ucl.ac.uk](mailto:r.blackburn@ucl.ac.uk)

**Email addresses:** DE: [d.etoori@ucl.ac.uk](mailto:d.etoori@ucl.ac.uk); MHP: [MinHae.Park@lshtm.ac.uk](mailto:MinHae.Park@lshtm.ac.uk); RB:

[r.blackburn@ucl.ac.uk](mailto:r.blackburn@ucl.ac.uk); KF: [kfitzsimons@rcseng.ac.uk](mailto:kfitzsimons@rcseng.ac.uk); SB: [sbutterworth@rcseng.ac.uk](mailto:sbutterworth@rcseng.ac.uk); JM;

[jmedina@rcseng.ac.uk](mailto:jmedina@rcseng.ac.uk); LMcGL: [l.mcgrath-lone@ucl.ac.uk](mailto:l.mcgrath-lone@ucl.ac.uk); CR:

[craig.russell@ggc.scot.nhs.uk](mailto:craig.russell@ggc.scot.nhs.uk); JVDM: [Jan.vanderMeulen@lshtm.ac.uk](mailto:Jan.vanderMeulen@lshtm.ac.uk)

**Key words:** COVID-19; orofacial cleft, cleft lip; cleft palate; timing of surgery



1  
2  
3 **Word count: Abstract 227; Text 2531**  
4

5  
6 **ABSTRACT**  
7

8  
9 **Objective** To quantify differences in number and timing of first primary cleft lip and palate  
10 (CLP) repair procedures during the first year of the COVID-19 pandemic (1st April 2020 to  
11 31st March 2021; 2020/21) compared to the preceding year (1st April 2019 to 31st March  
12 2020; 2019/21).  
13  
14  
15

16  
17  
18 **Design** National observational study of administrative hospital data.  
19

20  
21  
22 **Setting** National Health Service hospitals in England.  
23

24  
25 **Study population** Children <5 years undergoing primary repair for an orofacial cleft (OPCS-  
26 4 codes F031, F291)  
27  
28

29  
30 **Main exposure** Procedure date (2020/21 vs 2019/20)  
31

32  
33 **Main outcomes** Numbers and timing (age in months) of first primary CLP procedures.  
34

35  
36 **Results** 1,716 CLP primary repair procedures were included in the analysis. In 2020/21, 774  
37 CLP procedures were carried out compared to 942 in 2019/20, a reduction of 17.8 % (95%  
38 confidence interval 9.5% to 25.4%). The reduction varied over time in 2020/21, with no  
39 surgeries at all during the first two months (April and May 2020). Compared to 2019/20, first  
40 primary lip repair procedures performed in 2020/21 were delayed by 1.6 months on average  
41 (95% confidence interval 0.9 to 2.2 months). Delays in primary palate repairs were smaller  
42 on average but varied across the nine geographical regions.  
43  
44  
45  
46  
47  
48  
49  
50

51  
52  
53 **Conclusion** There were significant reductions in the number and delays in timing of first  
54 primary CLP repair procedures in England during the first year of the pandemic, which may  
55 affect long-term outcomes.  
56  
57  
58  
59  
60

## STRENGTHS AND LIMITATIONS OF THIS STUDY

- We analysed administrative hospital data (Hospital Episodes Statistics; HES) with whole nation coverage of England for children undergoing surgical repair of cleft lip and palate (CLP) at in two time periods; before (2019/20) or during (2020/21) the COVID-19 pandemic.
- Within these time periods we examined the timing of first surgical repair with respect to clinical guidelines advocating surgery for first repair of cleft lip in children aged 3-6 months and before age 13 months for cleft palate repair
- To reduce the risk of misclassifying the timing of surgery we restricted the study population to children born in hospitals in England, meaning that some children who had CLP surgery (but who did not have a birth record in HES) were excluded from the analysis.
- Even though our study had whole nation coverage of England the numbers of children within some important sub-groups (e.g. narrower ethnic groups) were insufficient to support further analysis.

## INTRODUCTION

Around 1 in 670 children in the England, Wales and Northern Ireland are born alive with an orofacial cleft that may affect only the lip, only the palate, or both. (1) An orofacial cleft can have significant effects on children's lives, including ongoing hearing loss, speech and language difficulties, psychosocial difficulties, and lower educational attainment. (2–7) It is recommended that children with a cleft palate have surgery to repair their cleft when they are between 6 and 12 months old as this would reduce the likelihood of negative outcomes. (8,9)

1  
2  
3 Cleft lip repair procedures are usually performed when the children are between 3 and 6  
4 months old, a time frame suggested by a handful of small studies showing that early repair  
5 leads to better aesthetic results, (10,11) improved feeding,(10) and better psychosocial  
6 development. (12)  
7  
8  
9  
10  
11  
12

13 Access to healthcare declined markedly during the COVID-19 pandemic. (13,14) This  
14 decline represents both the postponement and cancellation of planned care. For some time-  
15 sensitive procedures such as cleft lip and palate repair, delays could have a detrimental effect  
16 on long-term outcomes.  
17  
18  
19  
20  
21  
22

23 This study aimed to quantify the impact of the COVID-19 pandemic on the number and the  
24 timing of first primary cleft lip and/or palate (CLP) repair procedures using national  
25 longitudinal administrative hospital data from the English National Health Service (NHS).  
26 We hypothesised that there would be a reduction in the number of first primary CLP repair  
27 procedures during the COVID-19 pandemic year (2020/21) compared to the preceding year  
28 (2019/20). We defined the start of the first COVID-19 pandemic year as 1<sup>st</sup> April 2020 as this  
29 coincides closely with the official start of the first nationwide lockdown in England on 23<sup>rd</sup>  
30 March 2020. (15)  
31  
32  
33  
34  
35  
36  
37  
38  
39  
40  
41

42 We also hypothesised that first primary CLP repair procedures would be delayed during the  
43 pandemic, so that the children at the time of surgery would be older than in the preceding  
44 year. Quantifying the extent of delays to surgery is important for planning of the future needs  
45 of these children.  
46  
47  
48  
49  
50

## 51 **METHODS**

### 52 **Study design**

1  
2  
3 This is an observational study comparing the numbers of procedures, and the age at surgery  
4 for primary repair of cleft lip and/or palate at hospitals in England before (2019/20), or during  
5 (2020/21) the COVID-19 pandemic  
6  
7  
8  
9

### 10 **Data source and study population**

11  
12 We used the Hospital Episode Statistics (HES), a national database including records of all  
13 episodes in NHS hospitals derived from administrative data.(16) HES records include  
14 diagnostic fields coded according to the International Classification of Diseases – 10<sup>th</sup>  
15 revision (ICD-10) (17) and procedure fields coded according to the Population Consensus  
16 and Surveys Classification of Interventions and Procedures – 4<sup>th</sup> revisions (OPCS-4).(18)  
17  
18  
19

20 We identified all children born after 1<sup>st</sup> April 2014, who were considered to have an orofacial  
21 cleft because they had both a record with relevant diagnostic codes before their second  
22 birthday (or until 31<sup>st</sup> March, 2021, whatever came earlier) and a record with relevant CLP  
23 repair procedure codes before their fifth birthday (or until 31<sup>st</sup> March, 2021, whatever came  
24 earlier; see supplementary information 1 for code lists). We excluded children without a birth  
25 record in HES and children born from multiple pregnancies. Births recorded in HES represent  
26 97% of all births in England. (19) Please see Supplementary Figure 1.  
27  
28  
29  
30  
31  
32  
33  
34  
35  
36  
37  
38  
39  
40  
41

### 42 **Outcome and patient characteristics**

43  
44 In the children identified with an orofacial cleft, we determined the date of their first primary  
45 CLP repair procedures with primary lip repair and primary palate repairs treated separately  
46 such that some children contributed more than one surgery. Secondary procedures were  
47 excluded from the analytical sample as other factors might influence their timing, including  
48 the timing of the primary surgery. We used diagnostic codes to distinguish four cleft types  
49 (see supplementary information 2 for code lists): cleft lip only (CL), cleft palate only (CP),  
50 unilateral cleft lip and palate (UCLP), bilateral cleft lip and palate (BCLP). We used  
51  
52  
53  
54  
55  
56  
57  
58  
59  
60

1  
2  
3 procedure codes to capture the type of surgery: primary lip repair (F031) and primary palate  
4 repair (F291). We also used ICD-10 codes to determine whether there were other additional  
5 congenital malformations (Supplementary information 3). (20,21) Quintiles of the national  
6 distribution of the 2019 Index of Multiple Deprivation (IMD) rankings of 32,844 Lower  
7 Super Output Areas (LSOA; areas with typically 1,500 inhabitants and 600 households) were  
8 used to categorise children into 5 groups according to their socioeconomic background. (22)  
9  
10 Ethnicity was coded as White, and minority ethnicity including Black, Asian, mixed race, and  
11 other. Nine geographic regions of residence that correspond to the 9 regionally commissioned  
12 cleft services of England were derived from the LSOA.

### 23 24 **Statistical analyses**

25  
26 We counted the number of first primary CLP repair procedures in 2020/21 and 2019/20 and  
27 calculated the relative difference between these numbers. Confidence intervals for these  
28 relative differences were calculated using the conditional method for testing differences  
29 between two Poisson means. (23) We used the Mantel-Haenszel test of homogeneity to  
30 investigate whether the difference between the number of procedures in 2019/20 and 2020/21  
31 varied according to the children's characteristics.

32  
33 To investigate changes in timing of first primary CLP repair procedures, we compared the  
34 mean age at the time of the first primary CLP procedures carried out in 2019/20 and 2020/21  
35 with the t-test. Linear regression with interaction terms was used to test whether the  
36 difference between the means in 2019/20 and 2020/21 varied according to the children's  
37 characteristics.

38  
39 Children with missing data on a specific characteristic were not included in the analyses  
40 involving that characteristic. A p-value <0.05 was considered to indicate a statistically  
41 significant result. All analyses were performed in Stata V.17 (Statacorp). (24)

## Patient and public involvement

The ECHILD project undertakes regular patient and public involvement (PPI) including the acceptability of the use of de-identified data from healthcare and education settings, and research priorities for these datasets. Children and parents in our PPI workshops identified understanding the health and education impact of the pandemic on children with additional clinical needs (such as CLP) as a key priority for research.

## RESULTS

### Study population

We identified 6,438 children with a CLP procedure code recorded before the age of 5 between 1<sup>st</sup> April 2014 and 31<sup>st</sup> March 2021. Of these, 680 (10.6%) did not have a birth record or were born from multiple pregnancies and 257 (4.0%) did not have a CLP diagnostic code recorded before the age of 2. These children were therefore excluded (Supplementary Figure 1).

### Number of first primary CLP repair procedures during the COVID-19 pandemic

In the remaining 5,501 children, we identified 774 first primary CLP procedures in 2020/21 corresponding to 321 first lip repair and 453 first palate repairs. This was in comparison to 942 procedures (408 lip repairs, 534 palate repairs) in 2019/20, a reduction of 17.8 % (95% confidence interval 9.5% to 25.4%;  $p < 0.001$ ; Table 1).

**Table 1:** Number of first primary cleft lip and palate repair procedures by year of surgery and the children's characteristics

|                             | Number of procedures |         |                              |         |                |         |                              |         |
|-----------------------------|----------------------|---------|------------------------------|---------|----------------|---------|------------------------------|---------|
|                             | Lip repair           |         |                              |         | Palate repairs |         |                              |         |
| Year of surgery*            | 2019/20              | 2020/21 | Relative difference (95% CI) | p-value | 2019/20        | 2020/21 | Relative difference (95% CI) | p-value |
| All                         | 408                  | 321     | -21.32 (-32.24, -8.71)       | 0.0013  | 534            | 453     | -15.17 (-25.32, -3.67)       | 0.0099  |
| Cleft type                  | (p=0.6389) **        |         |                              |         | (p=0.8277) **  |         |                              |         |
| Cleft lip only              | 157                  | 116     | -26.11 (-42.39, -5.47)       | 0.0131  | —              | —       | —                            | —       |
| Cleft palate only           | —                    | —       | —                            | —       | 284            | 233     | -17.96 (-31.31, -2.09)       | 0.0249  |
| Unilateral CLP              | 165                  | 141     | -14.54 (-32.24, 7.65)        | 0.1707  | 164            | 147     | -10.37 (-28.75, 12.67)       | 0.3358  |
| Bilateral CLP               | 86                   | 64      | -25.58 (-47.01, 4.05)        | 0.073   | 86             | 73      | -15.12 (-38.73, 17.32)       | 0.3041  |
| Congenital malformations    | (p=0.1867) **        |         |                              |         | (p=0.0210) **  |         |                              |         |
| No additional malformations | 282                  | 207     | -26.60 (-38.95, -11.86)      | 0.0007  | 240            | 237     | -1.25 (-17.82, 18.66)        | 0.8909  |
| Additional malformations    | 126                  | 114     | -9.52 (-30.39, 17.50)        | 0.4396  | 294            | 216     | -26.53 (-38.65, -12.12)      | 0.0005  |
| IMD quintile                | (p=0.9045) **        |         |                              |         | (p=0.8962) **  |         |                              |         |
| Q1 (Most deprived)          | 94                   | 86      | -8.51 (-32.51, 23.90)        | 0.5522  | 127            | 114     | -10.24 (-30.91, 16.51)       | 0.4034  |
| Q2                          | 79                   | 61      | -22.78 (-45.64, 9.22)        | 0.1293  | 117            | 98      | -16.24 (-36.62, 10.49)       | 0.196   |
| Q3                          | 65                   | 53      | -18.46 (-44.36, 19.02)       | 0.2712  | 92             | 78      | -15.22 (-38.11, 15.90)       | 0.2843  |
| Q4                          | 61                   | 45      | -26.23 (-50.95, 10.23)       | 0.1215  | 62             | 51      | -17.74 (-44.35, 21.11)       | 0.3029  |
| Q5 (least deprived)         | 47                   | 36      | -23.40 (-51.79, 20.79)       | 0.2299  | 55             | 57      | 3.51 (-42.28, 34.61)         | 0.8509  |
| Missing                     | 62                   | 40      | —                            | —       | 81             | 55      | —                            | —       |
| Ethnicity                   | (p=0.7415) **        |         |                              |         | (p=0.3669) **  |         |                              |         |
| White/White British         | 327                  | 253     | -22.63 (-34.60, -8.55)       | 0.0021  | 414            | 341     | -17.63 (-28.84, -4.71)       | 0.0079  |
| Minority ethnicity          | 74                   | 61      | -17.57 (-42.25, 17.28)       | 0.2649  | 112            | 106     | -5.36 (-28.12, 24.55)        | 0.6852  |
| Missing                     | 7                    | 7       | —                            | —       | 8              | 6       | —                            | —       |
| Region                      | (p=0.4821) **        |         |                              |         | (p=0.3715) **  |         |                              |         |
| North-East                  | 25                   | 20      | -8.70 (-51.94, 72.56)        | 0.766   | 20             | 30      | 34.37 (-17.37, 64.03)        | 0.1337  |

|                 |                         |     |                         |         |                         |     |                         |         |
|-----------------|-------------------------|-----|-------------------------|---------|-------------------------|-----|-------------------------|---------|
| North-West      | 45                      | 50  | 6.12 (-43.34, 38.61)    | 0.7596  | 75                      | 60  | -18.42 (-42.63, 15.61)  | 0.2349  |
| Yorkshire       | 40                      | 30  | -21.05 (-52.76, 30.85)  | 0.3356  | 55                      | 40  | -28.30 (-54.01, 10.82)  | 0.1174  |
| East Midlands   | 35                      | 30  | -14.29 (-49.17, 43.71)  | 0.5386  | 35                      | 25  | -27.78 (-58.13, 22.98)  | 0.2074  |
| West Midlands   | 30                      | 30  | -3.12 (-42.83, 63.95)   | 0.9007  | 45                      | 50  | 9.80 (-37.07, 40.79)    | 0.6137  |
| East of England | 30                      | 25  | -28.12 (-59.84, 26.73)  | 0.2288  | 40                      | 30  | -28.57 (-56.83, 16.87)  | 0.1597  |
| London          | 50                      | 35  | -28.57 (-55.07, 12.49)  | 0.1284  | 60                      | 60  | 0 (-45.48, 31.26)       | 1.0000  |
| South-East      | 50                      | 45  | -9.61 (-40.40, 36.74)   | 0.6173  | 65                      | 65  | -1.54 (-31.38, 41.24)   | 0.9302  |
| South-West      | 35                      | 15  | -57.14 (-78.25, -19.47) | 0.0046  | 40                      | 30  | -21.95 (-52.42, 27.01)  | 0.2954  |
| Missing         | 65                      | 40  | —                       | —       | 95                      | 60  | —                       | —       |
| <b>Quarter</b>  | <b>(p&lt;0.0001) **</b> |     |                         |         | <b>(p&lt;0.0001) **</b> |     |                         |         |
| Q1 (Apr-Jun)    | 105                     | 10  | -90.48 (-95.56, -81.78) | <0.0001 | 136                     | 27  | -80.15 (-87.38, -69.83) | <0.0001 |
| Q2 (Jul-Sep)    | 107                     | 110 | 2.73 (-26.16, 28.10)    | 0.839   | 149                     | 182 | 18.13 (-2.22, 34.52)    | 0.07    |
| Q3 (Oct-Dec)    | 103                     | 140 | 26.43 (4.43, 43.52)     | 0.0177  | 123                     | 130 | 5.38 (-22.01, 26.66)    | 0.6606  |
| Q4 (Jan-Mar)    | 93                      | 61  | -34.41 (-53.31, -8.43)  | 0.0099  | 126                     | 114 | -9.52 (-30.39, 17.50)   | 0.4396  |

\* 2020/21: first year of COVID-19 pandemic; 2019/20: preceding year.

\*\* – Mantel-Haenszel test for homogeneity, testing if the relative differences vary according to the children's characteristics.

Region figures rounded to the nearest 5 for disclosure control.



1  
2  
3 The reduction in the number of first lip repair observed in 2020/21 did not vary significantly  
4 according to the children's characteristics (p always >0.1 for cleft type, presence of additional  
5 anomalies, deprivation or ethnicity) or geographic region of residence. However, the  
6 reduction in lip repairs did vary according to quarterly period (p<0.0001).  
7  
8  
9  
10  
11  
12

13 The reduction in the number of the first primary palate repair procedures in 2020/21 varied  
14 according to quarterly period (p<0.0001) and was significantly larger for children with  
15 additional congenital malformations (p=0.0210).  
16  
17  
18  
19  
20

21 No repair procedures were carried out in the first two months of the study period (1<sup>st</sup> April to  
22 31<sup>st</sup> May 2020), primary cleft surgery resumed in the third month of the first quarter. The  
23 numbers of first primary procedures undertaken in the second and third quarters of 2020/21  
24 (1<sup>st</sup> July and 31<sup>st</sup> December 2020) were higher and the number in the fourth quarter (between  
25 1<sup>st</sup> January to 31<sup>st</sup> March) was lower than in the corresponding months in the preceding year.  
26  
27  
28  
29  
30  
31  
32 (Figure 1)  
33  
34

### 35 **Timing of CLP surgeries before and during the COVID-19 pandemic**

36  
37 The mean age at the first primary lip repairs increased by 1.6 months (95% CI: 0.9, 2.2) in the  
38 first year of the COVID-19 pandemic compared to 2019/20 (see also Figure 2). This increase  
39 in age did not vary according to the children's characteristics (p always > 0.1). The largest  
40 increases in mean age of lip repairs were in the South-West 3.9 months (95% CI:), the East  
41 Midlands 3.5 months (95% CI:), and the first quarter of 2020/2021 3.4 months (95% CI:).  
42  
43  
44  
45  
46  
47  
48  
49 (Table 2)  
50  
51  
52  
53  
54  
55  
56  
57  
58  
59  
60

**Table 2:** Mean age at first primary CLP repair surgery by year of surgery and exposure variables

|                             | Mean age at surgery in months (95% CI) |                   |                    |         |                      |                      |                     |         |
|-----------------------------|----------------------------------------|-------------------|--------------------|---------|----------------------|----------------------|---------------------|---------|
|                             | Lip repair                             |                   |                    |         | Palate repairs       |                      |                     |         |
| Year of surgery             | 2019/20                                | 2020/21           | Difference         | p-value | 2019/20              | 2020/21              | Difference          | p-value |
| All                         | 5.72 (5.28, 6.15)                      | 7.30 (6.84, 7.76) | 1.58 (0.94, 2.22)  | <0.0001 | 11.19 (10.60, 11.77) | 11.81 (11.30, 12.33) | 0.63 (-0.16, 1.42)  | 0.1209  |
| Cleft type                  | (p=0.4166)**                           |                   |                    |         | (p=0.9728)**         |                      |                     |         |
| Cleft lip only              | 5.42 (4.77, 6.08)                      | 7.14 (6.22, 8.05) | 1.71 (0.62, 2.80)  | 0.0022  | —                    | —                    | —                   | —       |
| Cleft palate only           | —                                      | —                 | —                  | —       | 12.74 (11.92, 13.57) | 13.50 (12.74, 14.25) | 0.75 (-0.39, 1.88)  | 0.1961  |
| Unilateral CLP              | 5.46 (4.83, 6.10)                      | 7.34 (6.81, 7.87) | 1.88 (1.04, 2.72)  | <0.0001 | 8.96 (8.10, 9.82)    | 9.66 (9.08, 10.25)   | 0.70 (-0.35, 1.76)  | 0.1919  |
| Bilateral CLP               | 6.75 (5.58, 7.93)                      | 7.51 (6.31, 8.70) | 0.75 (-0.94, 2.45) | 0.3816  | 10.28 (8.73, 11.83)  | 10.77 (9.29, 12.24)  | 0.49 (-1.66, 2.64)  | 0.6525  |
| Congenital malformations    | (p=0.8086)**                           |                   |                    |         | (p=0.4014)**         |                      |                     |         |
| No additional malformations | 5.02 (4.68, 5.37)                      | 6.56 (6.14, 6.98) | 1.53 (0.99, 2.07)  | <0.0001 | 9.27 (8.64, 9.90)    | 10.47 (9.95, 10.98)  | 1.20 (0.38, 2.01)   | 0.0039  |
| Additional malformations    | 7.27 (6.13, 8.42)                      | 8.65 (7.61, 9.68) | 1.37 (-0.17, 2.91) | 0.0813  | 12.75 (11.86, 13.65) | 13.29 (12.41, 14.18) | 0.54 (-0.75, 1.83)  | 0.4102  |
| IMD quintile                | (p=0.9259)**                           |                   |                    |         | (p=0.9099)**         |                      |                     |         |
| Q1 (Most deprived)          | 5.42 (4.58, 6.26)                      | 7.29 (6.35, 8.23) | 1.87 (0.62, 3.12)  | 0.0035  | 10.38 (9.29, 11.48)  | 11.64 (10.40, 12.88) | 1.26 (-0.38, 2.90)  | 0.132   |
| Q2                          | 6.34 (5.09, 7.59)                      | 8.25 (6.68, 9.82) | 1.91 (-0.05, 3.87) | 0.0561  | 10.87 (9.83, 11.91)  | 11.47 (10.54, 12.40) | 0.60 (-0.82, 2.01)  | 0.4067  |
| Q3                          | 5.85 (5.02, 6.69)                      | 7.18 (6.55, 7.81) | 1.33 (0.25, 2.40)  | 0.0164  | 10.42 (9.29, 11.55)  | 11.51 (10.52, 12.50) | 1.09 (-0.42, 2.61)  | 0.1557  |
| Q4                          | 5.96 (4.52, 7.41)                      | 7.06 (5.77, 8.35) | 1.10 (-0.89, 3.09) | 0.2772  | 11.22 (9.63, 12.80)  | 12.45 (10.62, 14.28) | 1.23 (-1.15, 3.62)  | 0.3086  |
| Q5 (least deprived)         | 4.91 (4.40, 5.41)                      | 6.83 (5.95, 7.72) | 1.93 (0.98, 2.87)  | 0.0001  | 11.78 (10.21, 13.35) | 13.68 (12.05, 15.32) | 1.91 (-0.34, 4.15)  | 0.0949  |
| Ethnicity                   | (p=0.9406)**                           |                   |                    |         | (p=0.9348)**         |                      |                     |         |
| White/White British         | 5.54 (5.09, 6.00)                      | 7.23 (6.72, 7.75) | 1.69 (1.00, 2.38)  | <0.0001 | 11.34 (10.64, 12.04) | 11.94 (11.34, 12.54) | 0.60 (-0.34, 1.54)  | 0.2129  |
| Minority ethnicity          | 6.00 (5.06, 6.93)                      | 7.63 (6.44, 8.82) | 1.63 (0.15, 3.11)  | 0.0312  | 10.81 (9.80, 11.82)  | 11.49 (10.40, 12.57) | 0.68 (-0.80, 2.15)  | 0.3659  |
| Region                      | (p=0.2113)**                           |                   |                    |         | (p=0.0022)**         |                      |                     |         |
| North-East                  | 4.92 (3.44, 6.41)                      | 5.51 (4.30, 6.72) | 0.59 (-1.29, 2.47) | 0.5297  | 10.27 (8.15, 12.39)  | 9.76 (8.39, 11.13)   | -0.51 (-2.86, 1.83) | 0.6622  |
| North-West                  | 5.10 (4.08, 6.12)                      | 7.13 (5.80, 8.46) | 2.03 (0.36, 3.70)  | 0.0176  | 8.45 (7.36, 9.54)    | 11.02 (9.15, 12.88)  | 2.56 (0.51, 4.62)   | 0.0146  |
| Yorkshire                   | 4.87 (4.08, 5.66)                      | 7.00 (5.55, 8.45) | 2.13 (0.59, 3.66)  | 0.0072  | 9.68 (8.37, 10.99)   | 11.21 (8.32, 14.10)  | 1.53 (-1.31, 4.37)  | 0.2881  |

1  
2  
3  
4  
5  
6  
7  
8  
9  
10  
11  
12  
13  
14  
15  
16  
17  
18  
19  
20  
21  
22  
23  
24  
25  
26  
27  
28  
29  
30  
31  
32  
33  
34  
35  
36  
37  
38  
39  
40  
41  
42  
43  
44  
45  
46

|                 |                     |                    |                    |         |                      |                      |                     |         |
|-----------------|---------------------|--------------------|--------------------|---------|----------------------|----------------------|---------------------|---------|
| East Midlands   | 4.71 (3.95, 5.46)   | 8.16 (6.81, 9.51)  | 3.45 (2.00, 4.91)  | <0.0001 | 9.15 (7.56, 10.74)   | 11.36 (9.30, 13.42)  | 2.21 (-0.29, 4.72)  | 0.0827  |
| West Midlands   | 6.41 (4.02, 8.80)   | 8.33 (7.59, 9.06)  | 1.91 (-0.57, 4.40) | 0.1283  | 10.34 (8.60, 12.08)  | 11.20 (10.43, 11.96) | 0.86 (-0.95, 2.67)  | 0.3492  |
| East of England | 5.55 (4.47, 6.64)   | 5.88 (5.11, 6.65)  | 0.33 (-1.08, 1.73) | 0.6439  | 12.12 (9.60, 14.64)  | 12.14 (10.05, 14.22) | 0.01 (-3.40, 3.43)  | 0.9935  |
| London          | 6.36 (4.50, 8.22)   | 6.88 (4.56, 9.21)  | 0.52 (-2.38, 3.43) | 0.7203  | 12.04 (10.09, 13.99) | 10.83 (10.02, 11.64) | -1.21 (-3.30, 0.87) | 0.252   |
| South-East      | 6.51 (5.02, 8.00)   | 8.34 (6.84, 9.84)  | 1.83 (-0.26, 3.92) | 0.0858  | 14.16 (12.34, 15.97) | 13.91 (12.61, 15.21) | -0.24 (-2.46, 1.97) | 0.829   |
| South-West      | 5.83 (5.18, 6.48)   | 9.72 (8.50, 10.93) | 3.89 (2.66, 5.12)  | <0.0001 | 10.96 (9.59, 12.33)  | 16.51 (14.42, 18.60) | 5.55 (3.18, 7.92)   | <0.0001 |
| <b>Quarter</b>  | <b>(p=0.6010)**</b> |                    |                    |         | <b>(p=0.5800)**</b>  |                      |                     |         |
| Q1 (Apr-Jun)    | 5.52 (4.53, 6.51)   | 8.92 (7.15, 10.69) | 3.40 (0.14, 6.66)  | 0.0412  | 10.79 (9.85, 11.74)  | 12.17 (11.11, 13.24) | 1.38 (-0.80, 3.56)  | 0.2142  |
| Q2 (Jul-Sep)    | 6.19 (5.18, 7.21)   | 7.47 (6.87, 8.07)  | 1.27 (0.11, 2.44)  | 0.0322  | 12.33 (11.01, 13.64) | 12.34 (11.58, 13.09) | 0.01 (-1.44, 1.45)  | 0.9915  |
| Q3 (Oct-Dec)    | 5.39 (4.66, 6.12)   | 7.02 (6.22, 7.82)  | 1.63 (0.51, 2.75)  | 0.0046  | 10.62 (9.46, 11.77)  | 11.80 (10.54, 13.07) | 1.19 (-0.52, 2.90)  | 0.1721  |
| Q4 (Jan-Mar)    | 5.76 (5.08, 6.43)   | 7.37 (6.16, 8.57)  | 1.61 (0.34, 2.88)  | 0.0133  | 10.82 (9.62, 12.03)  | 10.91 (10.11, 11.71) | 0.08 (-1.38, 1.55)  | 0.9093  |

\* 2020/21: first year of COVID-19 pandemic; 2019/20: preceding year.

\*\* Test for interaction testing to see if the differences in mean age vary according to the children’s characteristic

1  
2  
3  
4 At national level, mean age at the first primary palate repair did not increase during 2020/21  
5 (0.6 months, 95% CI: -0.2, 1.4) but there was some evidence of regional variation (p=0.0022)  
6  
7 with the largest increases in mean age being observed in the South-West (5.6 months; 95%  
8  
9 CI: 3.2 to 7.9) and North-West (2.6 months; 95% CI: 0.5, 4.6).  
10  
11  
12

13  
14 There was an increase in the proportion of lip repairs carried out after the age of 6 months  
15 from 19.4% (79/408; 95% CI: 15.6%, 23.5%) in 2019/20 to 57.9% (186/321; 95% CI: 52.3%,  
16  
17 63.4%) in 2020/21 (p < 0.0001). There was also a small but significant increase in the  
18  
19 proportion of palate repairs carried out after the age of 12 months from 22.5% (120/534; 95%  
20  
21 CI: 19.0%, 26.2%) in 2019/20 to 28.7% (130/453; 95% CI: 24.6%, 33.1%) in 2020/21 (p =  
22  
23 0.025).  
24  
25  
26  
27

## 28 **DISCUSSION**

29  
30  
31 This national study using routinely collected administrative hospital data of children born  
32 with an orofacial cleft in England found an 18% reduction in the number of first primary CLP  
33  
34 repair procedures during the first year of the COVID-19 pandemic, as well as a delay of 1.6  
35  
36 months in the timing of the first primary lip repair procedure, compared to the preceding  
37  
38 year. The largest difference was observed during the first quarter of the COVID-19 pandemic  
39  
40 period. Also, the delay in the timing of procedures varied across the country with children  
41  
42 residing in the South-West most affected.  
43  
44  
45  
46  
47

48 The study has several strengths. First, the study population had excellent geographical  
49 coverage of England, reflecting all NHS hospitals. Secondly, by using both diagnosis and  
50  
51 procedure codes to identify the study population, the impact of coding errors on the  
52  
53 differences reported will have been reduced. Third, the relatively large study population made  
54  
55 it possible to report differences in number and timing of first primary CLP repair surgeries  
56  
57 undertaken by patient characteristics, by region and quarterly period.  
58  
59  
60

1  
2  
3 Limitations include that for some children data items on their specific diagnosis were missing  
4 and when differences were compared by the children's characteristics, our results were based  
5 only on a complete-case analysis. It is unclear what impact this may have on the results  
6 reported as it is not known whether children with missing data were more or less likely to  
7 have delayed surgery for CLP repair than those with complete data. The use of ICD-10 and  
8 OPCS-4 codes may not capture more nuanced clinical information about individual diagnoses  
9 and procedures.

10  
11 We showed that CLP repair surgery completely stopped in April and May 2020, which  
12 coincides with the start of the first national "lockdown" in England on 26<sup>th</sup> March 2020. This  
13 translated to a reduction in numbers of both primary lip repairs and primary palate repairs.  
14 Stakeholders will need to continue monitoring this as these reductions could have long term  
15 consequences (e.g. on speech development) and may have a time lag in their effect. The  
16 reduction in the number of first palate repair surgeries for children with additional congenital  
17 malformations was larger than for children without additional malformations, which may  
18 reflect deferred surgeries for children at higher risk of complications from COVID-19 (25).  
19 We also showed an increase in the age at first lip repair surgery, but no significant increase in  
20 the age at first palate repair. This may reflect clinical prioritisation of primary cleft palate  
21 repairs over cleft lip repairs. UK national guidance suggests that palate repair should be  
22 complete by 13 months of age (guidance palate repair at age 6 to 13 months) ( UK guidance;  
23 3-6 months of age for lip repairs)(26,27). However, we also showed that a significantly  
24 larger proportion of children had their first palate repair surgery after 12 months which might  
25 have long term consequences for education attainment as children who receive palate repairs  
26 after 13 months have been shown to have less favourable speech outcomes. (8,9)

27  
28 We note that birth rates for England have slightly decreased over the study period, with a  
29 proportionate decline in the number of children born with CLP. (28) This may have had a

1  
2  
3 small impact on the number of expected operations but does not fully explain the observed  
4  
5 reduction in number of procedures. The number of registrations recorded in CRANE for  
6  
7 children born with cleft was approximately 7.7% lower in 2021 compared to 2020, (29)  
8  
9 which is not sufficient to explain the relative reduction observed in our study (17.8%  
10  
11 reduction). Furthermore, we observed delays in the timing of the lip and palate repairs (which  
12  
13 is not dependent on the number of children born with a cleft), albeit the difference observed  
14  
15 for palate repairs was not statistically significant.  
16  
17  
18  
19

20 Our study indicated that there were regional variations in the impact of the COVID-19  
21  
22 pandemic on the timing of first primary CLP repair procedures, which may reflect differences  
23  
24 in the regions' influence on management decision making, resources, fragility, and capacity  
25  
26 for recovery. The delay of almost 6 months seen in one region with other regions showing  
27  
28 hardly any delay in the timing of first primary CLP repair procedures requires further  
29  
30 investigation. COVID-19 pandemic associated delays in CLP repair have been reported in  
31  
32 other countries, including a single-centre study in Peru where 172 patients demonstrated  
33  
34 increases in age at the time of primary lip and palate repair. (30) Similarly, reduced volumes  
35  
36 of procedures were recorded during the pandemic (relative to the pre-pandemic period) for  
37  
38 Low and Middle Income Countries reporting to the Smile Train Express platform. (31)  
39  
40  
41  
42

43 This paper follows on from previous work which showed reductions in planned care during  
44  
45 the pandemic and acts as a deeper dive into one specific type of planned care. (32) This work  
46  
47 focuses on primary procedures which were given some prioritisation during the pandemic and  
48  
49 as such might downplay its effect on wider cleft services. For example, secondary procedures  
50  
51 such as Alveolar bone graft and secondary speech surgery are time sensitive but have less  
52  
53 evidence supporting them. While the Federation of Specialist Surgical Associations Clinical  
54  
55 Guide to Surgical Prioritisation during the COVID pandemic gave similar priority to primary  
56  
57 and secondary cleft procedures, shop floor practicality may not necessarily have allowed  
58  
59  
60

1  
2  
3 equal treatment. (33) Further work needs to be done to understand the full effect of the  
4  
5 pandemic on all cleft surgery especially the more temporarily sensitive secondary cleft  
6  
7 procedures (alveolar bone grafting and secondary speech surgery).  
8  
9

10  
11 In conclusion, during the first year of the COVID-19 pandemic a larger proportion of  
12  
13 children had their cleft repair surgery outside of the recommended timeframe (3 to 6 months  
14  
15 for lip repair and 6 to 13 months for palate repair). Previous research has shown that late  
16  
17 surgery may be associated with delays in speech development and the need for additional  
18  
19 speech therapy.(8,9) Delayed surgery beyond 13 months is thought to affect articulation  
20  
21 following cleft palate repair, and the resulting need for extra corrective speech therapy may  
22  
23 contribute to additional absence from school, potentially affecting primary educational  
24  
25 attainment.(7,34) Future research should therefore consider investigating the effect of delay  
26  
27 in surgery on educational outcomes to model the long-term implications of the COVID  
28  
29 pandemic.  
30  
31  
32

### 33 34 **FUNDING:**

35  
36  
37 This project was funded by the National Institute for Health and Care Research  
38  
39 (NIHR) Policy Research Programme. The views expressed are those of the author(s)  
40  
41 and not necessarily those of the NIHR or the Department of Health and Social Care.  
42  
43  
44

45  
46 This research was supported in part by the NIHR Great Ormond Street Hospital  
47  
48 Biomedical Research Centre and the Health Data Research UK (grant no: LOND1),  
49  
50 which is funded by the UK Medical Research Council and eight other funders. RB is  
51  
52 supported by a UKRI Innovation Fellowship funded by the Medical Research Council (grant  
53  
54 number MR/S003797/1).  
55  
56  
57  
58  
59

### 60 **AUTHOR CONTRIBUTIONS**

JVDM and MHP developed the research question. DE, LMGL and RB operationalised the research question jointly with JVDM and MHP using data available via UCL Child Health Informatics team. DE undertook the analysis and drafted the manuscript. KF, SB, JM and CR provided essential clinical and contextual input into the study design and analysis, and interpretation of the results. All authors provided oversight and input to the final manuscript.

## ACKNOWLEDGEMENTS

We thank Professor Ruth Gilbert and Professor Katie Harron for their support of the ECHILD project.

## ETHICAL APPROVAL

Ethical approval was not required for this study because only de-identified routinely collected data were analysed.

## CONFLICTS OF INTEREST

The authors have no conflicts of interest to declare

## DATA SHARING STATEMENT

Data are available on request from NHS Digital and may not be shared by the authors.

## REFERENCES

1. Cleft Lip and Palate Association (CLAPA), Cleft Registry and Audit Network (CRANE). CRANE 2020 Annual Report: Summary of findings for patients and parents/carers on children born with a cleft in England, Wales and Northern Ireland between January 2000 and December 2019. [Internet]. 2021 [cited 2022 Feb 3]. Available from: [https://www.crane-database.org.uk/content/uploads/2021/03/CRANE-2020-AR\\_Patients-Parents-Carers-Summary\\_V1.pdf](https://www.crane-database.org.uk/content/uploads/2021/03/CRANE-2020-AR_Patients-Parents-Carers-Summary_V1.pdf)



- 1  
2  
3 2. Fitzsimons KJ, Copley LP, Van Der Meulen JH, Panagamuwa C, Deacon SA.  
4  
5 Grommet Surgery in Children with Orofacial Clefts in England. *Cleft Palate Craniofac J*.  
6  
7 2017 Jan 1;54(1):80–9. <https://doi.org/10.1597/15-047>  
8  
9
- 10  
11 3. Mildinhal S. Speech and Language in the Patient with Cleft Palate. *Cleft Lip Palate*.  
12  
13 2012;16:137–46. <https://doi.org/10.1159/000337668>  
14  
15
- 16  
17 4. Stock N, Rumsey N. Living with a Cleft: Psychological Challenges, Support and  
18  
19 Intervention. In: *Cleft Lip and Palate: Diagnosis and Management*. 2013.  
20  
21 [https://doi.org/10.1007/978-3-642-30770-6\\_45](https://doi.org/10.1007/978-3-642-30770-6_45)  
22  
23
- 24  
25 5. Gallagher ER, Collett BR. Neurodevelopmental and Academic Outcomes in Children  
26  
27 With Orofacial Clefts: A Systematic Review. *Pediatrics*. 2019 Jul 1;144(1):e20184027.  
28  
29 <https://doi.org/10.1542/peds.2018-4027>  
30  
31
- 32  
33 6. Fitzsimons KJ, Copley LP, Setakis E, Charman SC, Deacon SA, Dearden L, et al.  
34  
35 Early academic achievement in children with isolated clefts: a population-based study in  
36  
37 England. *Arch Dis Child*. 2018 Apr 1;103(4):356–62. [https://doi.org/10.1136/archdischild-](https://doi.org/10.1136/archdischild-2017-313777)  
38  
39 [2017-313777](https://doi.org/10.1136/archdischild-2017-313777)  
40
- 41  
42 7. Fitzsimons KJ, Deacon SA, Copley LP, Park MH, Medina J, van der Meulen JH.  
43  
44 School absence and achievement in children with isolated orofacial clefts. *Arch Dis Child*.  
45  
46 2021 Feb 1;106(2):154–9. <https://doi.org/10.1136/archdischild-2020-319123>  
47  
48
- 49  
50 8. Shaffer AD, Ford MD, Losee JE, Goldstein J, Costello BJ, Grunwaldt LJ, et al. The  
51  
52 Association Between Age at Palatoplasty and Speech and Language Outcomes in Children  
53  
54 With Cleft Palate: An Observational Chart Review Study. *Cleft Palate Craniofac J*. 2020 Feb  
55  
56 1;57(2):148–60. <https://doi.org/10.1177/1055665619882566>  
57  
58  
59  
60

- 1  
2  
3 9. Lindeborg MM, Shakya P, Rai SM, Shaye DA. Optimizing speech outcomes for cleft  
4 palate. *Curr Opin Otolaryngol Head Neck Surg*. 2020 Aug;28(4):206–11.  
5  
6 <https://doi.org/10.1097/MOO.0000000000000635>  
7  
8  
9  
10  
11 10. Jiri B, Jana V, Michal J, Jiri K, Dana H, Miroslav T, et al. Successful early neonatal  
12 repair of cleft lip within first 8 days of life. *Int J Pediatr Otorhinolaryngol*. 2012 Nov  
13 1;76(11):1616–26. <https://doi.org/10.1016/j.ijporl.2012.07.031>  
14  
15  
16  
17  
18 11. Hammoudeh JA, Imahiyerobo TA, Liang F, Fahradyan A, Urbinelli L, Lau J, et al.  
19 Early Cleft Lip Repair Revisited: A Safe and Effective Approach Utilizing a  
20 Multidisciplinary Protocol. *Plast Reconstr Surg – Glob Open*. 2017 Jun;5(6):e1340.  
21  
22 <https://doi.org/10.1097/GOX.0000000000001340>  
23  
24  
25  
26  
27  
28 12. Petráčková I, Zach J, Borský J, Černý M, Hacklová R, Tvrdek M, et al. Early and late  
29 operation of cleft lip and intelligence quotient and psychosocial development in 3–7years.  
30 *Early Hum Dev*. 2015 Feb 1;91(2):149–52. <https://doi.org/10.1016/j.earlhumdev.2014.12.015>  
31  
32  
33  
34  
35  
36 13. Isba R, Edge R, Jenner R, Broughton E, Francis N, Butler J. Where have all the  
37 children gone? Decreases in paediatric emergency department attendances at the start of the  
38 COVID-19 pandemic of 2020. *Arch Dis Child*. 2020 Jul 1;105(7):704–704.  
39  
40  
41 <https://doi.org/10.1136/archdischild-2020-319385>  
42  
43  
44  
45  
46 14. Bottle A, Aylin P, Warner M, Propper C, Stoye G, Burn S. What happened to English  
47 NHS hospital activity during the COVID-19 pandemic? [Internet]. 2021 May [cited 2021  
48 Nov 30]. Available from: <https://ifs.org.uk/publications/15432>  
49  
50  
51  
52  
53 15. Timeline of UK government coronavirus lockdowns and restrictions [Internet]. The  
54 Institute for Government. 2021 [cited 2022 Sep 5]. Available from:  
55  
56 <https://www.instituteforgovernment.org.uk/charts/uk-government-coronavirus-lockdowns>  
57  
58  
59  
60

- 1  
2  
3 16. Herbert A, Wijlaars L, Zylbersztejn A, Cromwell D, Hardelid P. Data Resource  
4 Profile: Hospital Episode Statistics Admitted Patient Care (HES APC). *Int J Epidemiol*. 2017  
5 Aug 1;46(4):1093–1093i. <https://doi.org/10.1093/ije/dyx015>  
6  
7  
8  
9  
10  
11 17. WHO | ICD-10 online versions [Internet]. WHO. World Health Organization; [cited  
12 2020 Apr 20]. Available from: <http://www.who.int/classifications/icd/icdonlineversions/en/>  
13  
14  
15  
16 18. OPCS classification of interventions and procedures. Version 4.8. Version 4.8 (2017).  
17 London: Stationery Office; 2017. Available from: [https://digital.nhs.uk/data-and-](https://digital.nhs.uk/data-and-information/information-standards/information-standards-and-data-collections-including-extractions/publications-and-notifications/standards-and-collections/dapb0084-opcs-classification-of-interventions-and-procedures)  
18  
19  
20  
21  
22  
23  
24  
25  
26  
27  
28 19. Harron K, Gilbert R, Cromwell D, Meulen J van der. Linking Data for Mothers and  
29 Babies in De-Identified Electronic Health Data. *PLOS ONE*. 2016 Oct 20;11(10):e0164667.  
30  
31  
32  
33  
34  
35  
36 20. Fitzsimons K, Hamilton M, van der Meulen J, Medina J, Wahedally M, Park M, et al.  
37 Range and Frequency of Congenital Malformations Among Children With Cleft Lip and/or  
38 Palate. *Cleft Palate Craniofac J*. 2022 Apr 5;10556656221089160.  
39  
40  
41  
42  
43  
44  
45  
46 21. Zylbersztejn A, Verfürden M, Hardelid P, Gilbert R, Wijlaars L. Phenotyping  
47 congenital anomalies in administrative hospital records. *Paediatr Perinat Epidemiol*. 2020  
48 Jan;34(1):21–8. <https://doi.org/10.1111/ppe.12627>  
49  
50  
51  
52  
53 22. Office of the Deputy Prime Minister, Neighbourhood Renewal Unit. The English  
54 indices of deprivation 2004. [Internet]. London: Office of the Deputy Prime Minister; 2004.  
55  
56  
57 Available from:  
58  
59  
60

1  
2  
3 [https://www.brent.gov.uk/media/323946/SD%2062b%20Indices%20of%20multiple%20depre](https://www.brent.gov.uk/media/323946/SD%2062b%20Indices%20of%20multiple%20deprivation%202004.pdf)  
4 [viation%202004.pdf](https://www.brent.gov.uk/media/323946/SD%2062b%20Indices%20of%20multiple%20deprivation%202004.pdf)  
5  
6

7  
8 23. Hilbe JM. Modeling Count Data [Internet]. Cambridge: Cambridge University Press;  
9 2014 [cited 2022 Sep 5]. Available from: [https://www.cambridge.org/core/books/modeling-](https://www.cambridge.org/core/books/modeling-count-data/BFEB3985905CA70523D9F98DA8E64D08)  
10 [count-data/BFEB3985905CA70523D9F98DA8E64D08](https://www.cambridge.org/core/books/modeling-count-data/BFEB3985905CA70523D9F98DA8E64D08)  
11  
12

13  
14  
15 24. StataCorp. Stata Statistical Software. College Station, TX: StataCorp LLC; 2017.  
16

17  
18 25. COVID-19: guidance on protecting people defined on medical grounds as extremely  
19 vulnerable [Internet]. GOV.UK. [cited 2022 Dec 16]. Available from:  
20 [https://www.gov.uk/government/publications/guidance-on-shielding-and-protecting-](https://www.gov.uk/government/publications/guidance-on-shielding-and-protecting-extremely-vulnerable-persons-from-covid-19)  
21 [extremely-vulnerable-persons-from-covid-19](https://www.gov.uk/government/publications/guidance-on-shielding-and-protecting-extremely-vulnerable-persons-from-covid-19)  
22  
23  
24  
25  
26

27  
28 26. Federation of Surgical Specialty Association. Clinical Guide to Surgical Prioritisation  
29 During the Coronavirus Pandemic [Internet]. [cited 2022 Sep 5]. Available from:  
30 [https://fssa.org.uk/\\_userfiles/pages/files/covid19/prioritisation\\_master\\_250920.pdf](https://fssa.org.uk/_userfiles/pages/files/covid19/prioritisation_master_250920.pdf)  
31  
32  
33

34  
35 27. Resumption of Cleft Services [Internet]. CLAPA. [cited 2022 Feb 3]. Available from:  
36 <https://www.clapa.com/news-item/resumption-of-cleft-services/>  
37  
38

39  
40 28. Births in England and Wales: 2021, August 2022 [Internet]. Office for National  
41 Statistics. [cited 2023 Apr 17]. Available from:  
42 [https://www.ons.gov.uk/peoplepopulationandcommunity/birthsdeathsandmarriages/livebirths](https://www.ons.gov.uk/peoplepopulationandcommunity/birthsdeathsandmarriages/livebirths/bulletins/birthsummarytablesenglandandwales/2021)  
43 [/bulletins/birthsummarytablesenglandandwales/2021](https://www.ons.gov.uk/peoplepopulationandcommunity/birthsdeathsandmarriages/livebirths/bulletins/birthsummarytablesenglandandwales/2021)  
44  
45  
46  
47  
48

49  
50 29. Cleft Lip and Palate Association (CLAPA), Cleft Registry and Audit Network  
51 (CRANE). CRANE 2022 Annual Report: Summary of findings for patients and  
52 parents/carers on children born with a cleft in England, Wales and Northern Ireland between  
53 January 2000 and December 2021. [Internet]. 2022 [cited 2023 Apr 17]. Available from:  
54  
55  
56  
57  
58  
59  
60

1  
2  
3 [https://www.crane-database.org.uk/content/uploads/2022/12/CRANE-2022-Annual-](https://www.crane-database.org.uk/content/uploads/2022/12/CRANE-2022-Annual-Report_12Dec22.pdf)  
4  
5 Report\_12Dec22.pdf  
6  
7

8 30. Rossell-Perry P, Gavino-Gutierrez A. Cleft Lip and Palate Surgery during COVID-19  
9 Pandemic. *Plast Reconstr Surg Glob Open*. 2021 Jun 29;9(6):e3692. doi:  
10 10.1097/GOX.0000000000003692  
11  
12  
13  
14

15 31. Vander Burg R, Agrawal K, Desai P, Desalu I, Donkor P. Impact of COVID-19 on  
16 elective cleft surgery in low- and middle-income countries. *Plastic and Reconstructive*  
17 Surgery – Global Open. 2021; 9(6): pe3656. DOI: 10.1097/GOX.0000000000003656  
18  
19  
20  
21  
22

23 32. Etoori D, Harron KL, Grath-Lone LM, Verfürden ML, Gilbert R, Blackburn R.  
24 Reductions in hospital care among clinically vulnerable children aged 0–4 years during the  
25 COVID-19 pandemic. *Arch Dis Child* [Epub ahead of print]. 2022 Jun 20 [cited 2022 Sep 5];  
26 <https://doi.org/10.1136/archdischild-2021-323681>  
27  
28  
29  
30  
31

32 33. Clinical Guide to Surgical Prioritisation During the Coronavirus Pandemic [Internet].  
33 FSSA. [cited 2022 Dec 15]. Available from: [https://fssa.org.uk/covid-19\\_documents.aspx](https://fssa.org.uk/covid-19_documents.aspx)  
34  
35  
36  
37

38 34. Russell CJH, Fitzsimons KJ, Britton L, Van Eeden S, Butterworth S, Wahedally  
39 MHA, Park MH, Medina J, van der Meulen J, What Is The Optimal Timing Of Palate Repair  
40 For Speech Outcomes? Analysis Of Two Linked National Databases In England. [Oral  
41 presentation] CLEFT 2022 conference  
42  
43  
44  
45  
46  
47  
48  
49  
50  
51  
52  
53  
54  
55  
56  
57  
58  
59  
60

1  
2  
3 **Figure 1:** Monthly numbers of first primary cleft lip repair and palate repair procedures in  
4 the first year of the COVID-19 period (between April 2020 and March 2021; red line) and the  
5 preceding year (between April 2019 and March 2020; blue line).  
6  
7  
8  
9

10  
11  
12 \* Grey lines represent 5-year average (14/15 to 18/19) for historic comparison. Shaded areas  
13 represent lockdown periods (Lockdown 1: March 23 – June 23, 2020; Lockdown 2:  
14 November 5 – December 6, 2020; Lockdown 3: January 1 – March 8, 2021). CLP – Cleft lip  
15 and palate  
16  
17  
18  
19  
20  
21  
22  
23  
24  
25  
26  
27  
28  
29  
30  
31  
32  
33  
34  
35  
36  
37  
38  
39  
40  
41  
42  
43  
44  
45  
46  
47  
48  
49  
50  
51  
52  
53  
54  
55  
56  
57  
58  
59  
60

1  
2  
3  
4  
5  
6  
7  
8  
9  
10  
11  
12  
13  
14  
15  
16  
17  
18  
19  
20  
21  
22  
23  
24  
25  
26  
27  
28  
29  
30  
31  
32  
33  
34  
35  
36  
37  
38  
39  
40  
41  
42  
43  
44  
45  
46

**Figure 2:** Mean age at the first primary cleft lip and palate repair procedure in the first year of the COVID-19 pandemic (between April 2020 and March 2021; red square) and the preceding year (between April 2019 and March 2020; blue circle) with 95% confidence intervals.

Q1 – April – June; Q2 – July – September; Q3 – October – December; Q4 – January – March.

For peer review only

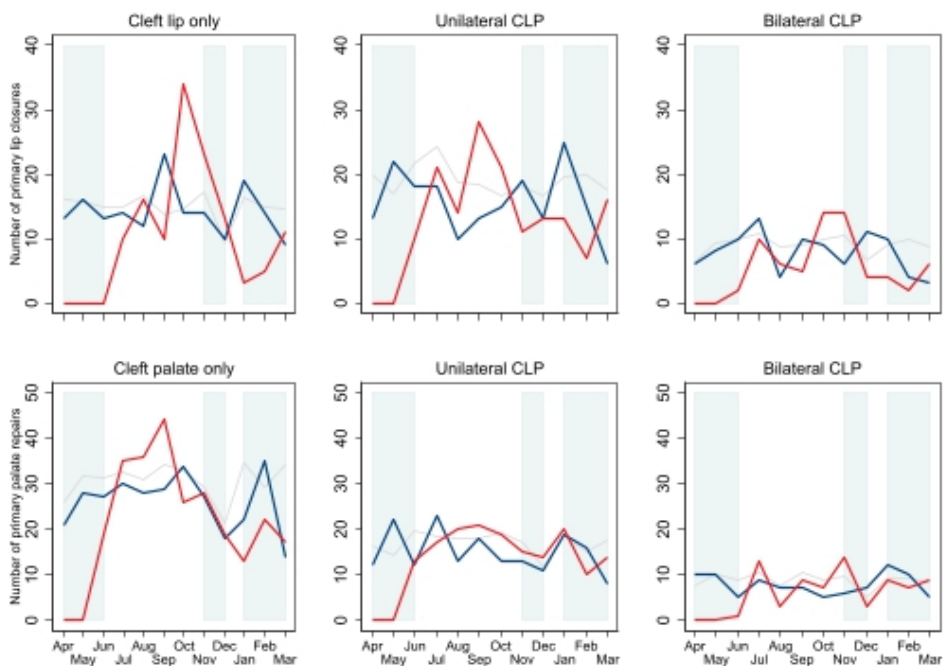

44x32mm (300 x 300 DPI)



1  
2  
3  
4  
5  
6  
7  
8  
9  
10  
11  
12  
13  
14  
15  
16  
17  
18  
19  
20  
21  
22  
23  
24  
25  
26  
27  
28  
29  
30  
31  
32  
33  
34  
35  
36  
37  
38  
39  
40  
41  
42  
43  
44  
45  
46  
47  
48  
49  
50  
51  
52  
53  
54  
55  
56  
57  
58  
59  
60

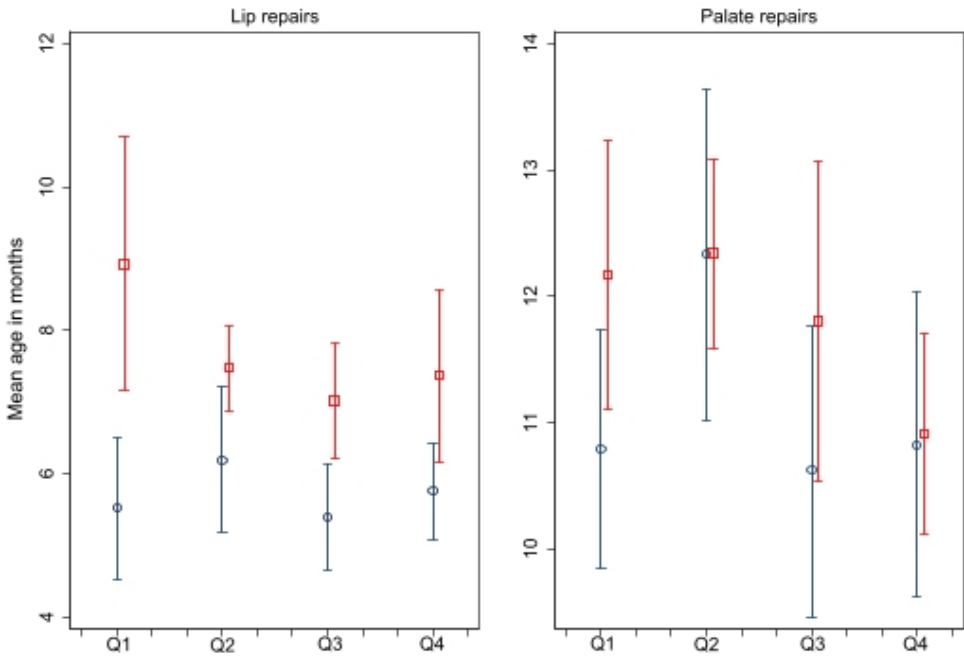

44x32mm (300 x 300 DPI)

**SUPPLEMENTARY MATERIALS**

**Supplementary Figure 1:** Flow chart showing inclusion criteria into the study

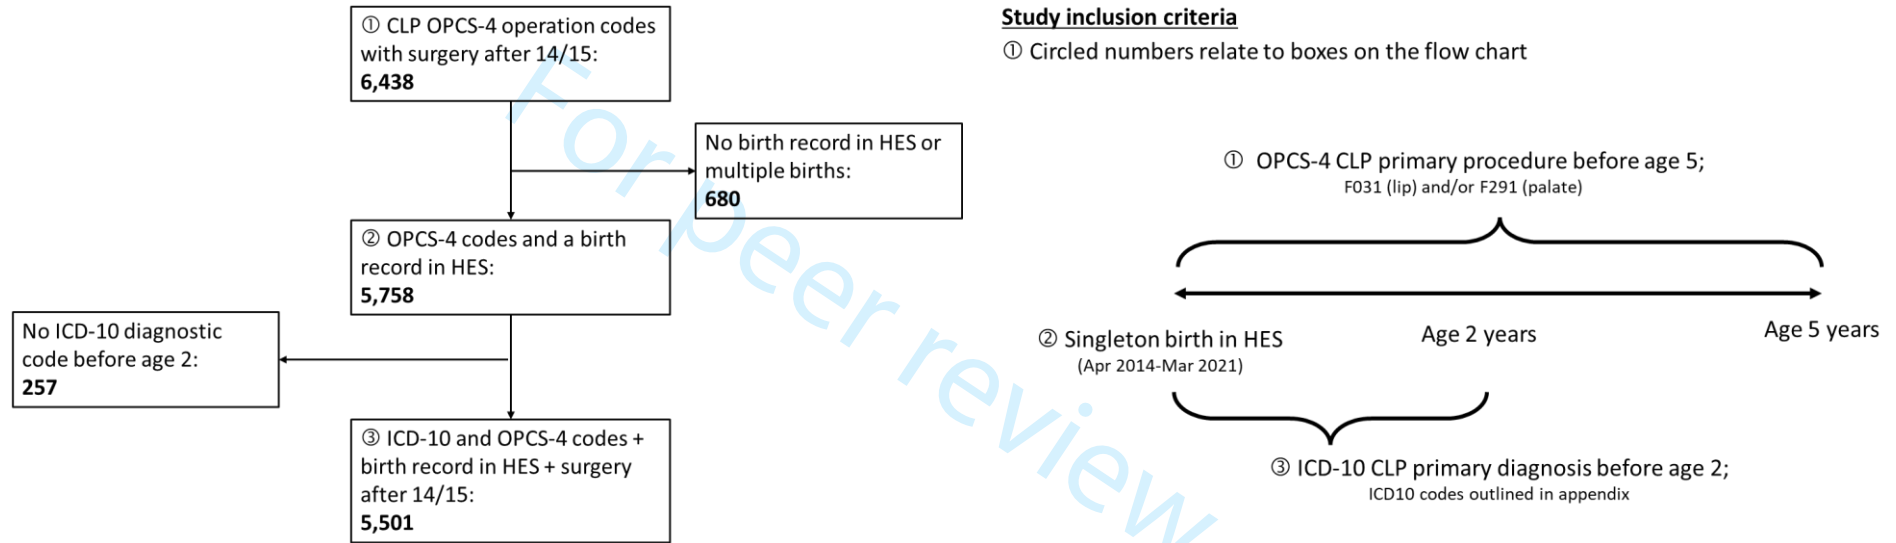

1  
2  
3 **Supplementary information 1: OPCS-4 CLP surgery procedure code lists**  
4  
5

| OPCS-4 code | Surgery type                 |
|-------------|------------------------------|
| F031        | Primary closure of cleft lip |
| F291        | Primary palate repair        |

6  
7  
8  
9  
10  
11  
12  
13  
14  
15  
16  
17  
18  
19 **Supplementary information 2: Cleft lip and palate ICD-10 codes**  
20  
21

| ICD-10 codes           | Cleft type                      |
|------------------------|---------------------------------|
| Q35x                   | Cleft lip                       |
| Q36x                   | Cleft palate                    |
| Q371, Q373, Q375, Q379 | Unilateral cleft lip and palate |
| Q370, Q372, Q374, Q378 | Bilateral cleft lip and palate  |

**Supplementary information 3: Congenital anomalies code list**

---

| Code                                                             | Description                                                   |
|------------------------------------------------------------------|---------------------------------------------------------------|
| <i>Congenital malformations of the nervous system</i>            |                                                               |
| Q00                                                              | Anencephaly and similar malformations                         |
| Q01                                                              | Encephalocele                                                 |
| Q02                                                              | Microcephaly                                                  |
| Q03                                                              | Congenital hydrocephalus                                      |
| Q04                                                              | Other congenital malformations of brain                       |
| Q05                                                              | Spina bifida                                                  |
| Q06                                                              | Other congenital malformations of spinal cord                 |
| Q07                                                              | Other congenital malformations of nervous system              |
| <hr/> <i>Congenital malformations of eye, ear, face and neck</i> |                                                               |
| Q10                                                              | Congenital ptosis                                             |
| Q11                                                              | Anophthalmos, microphthalmos and macrophthalmos               |
| Q12                                                              | Congenital lens malformations                                 |
| Q13                                                              | Congenital malformations of anterior segment of eye           |
| Q14                                                              | Congenital malformations of posterior segment of eye          |
| Q15                                                              | Other congenital malformations of eye                         |
| Q16                                                              | Congenital malformations of ear causing impairment of hearing |
| Q17                                                              | Other congenital malformations of ear                         |

- 1  
2  
3 Q18 Other congenital malformations of face and neck  
4  
5 

---

*Congenital malformations of the circulatory system*  
6  
7 Q20 Congenital malformations of cardiac chambers and connections  
8 Q21 Congenital malformations of cardiac septa  
9  
10 Q22 Congenital malformations of pulmonary and tricuspid valves  
11 Q23 Congenital malformations of aortic and mitral valves  
12  
13 Q24 Other congenital malformations of heart  
14  
15 Q25 Congenital malformations of great arteries  
16  
17 Q26 Congenital malformations of great veins  
18  
19 Q27 Other congenital malformations of peripheral vascular system  
20  
21 Q28 Other congenital malformations of circulatory system  
22 

---

*Congenital malformations of the respiratory system*  
23  
24 Q30 Congenital malformations of nose  
25  
26 Q31 Congenital malformations of larynx  
27  
28 Q32 Congenital malformations of trachea and bronchus  
29  
30 Q33 Congenital malformations of lung  
31  
32 Q34 Other congenital malformations of respiratory system  
33 

---

*Other congenital malformations of the digestive system*  
34  
35 Q38 Other congenital malformations of tongue, mouth and pharynx  
36  
37 Q39 Congenital malformations of oesophagus  
38  
39 Q40 Other congenital malformations of upper alimentary tract  
40  
41 Q41 Congenital absence, atresia and stenosis of small intestine  
42  
43  
44  
45  
46

- 1  
2  
3 Q42 Congenital absence, atresia and stenosis of large intestine  
4  
5 Q43 Other congenital malformations of intestine  
6  
7 Q44 Congenital malformations of gallbladder, bile ducts and liver  
8  
9 Q45 Other congenital malformations of digestive system  
10  
11 

---

*Congenital malformations of the genital organs*  
12 Q50 Congenital malformations of ovaries, fallopian tubes and broad ligaments  
13 Q51 Congenital malformations of uterus and cervix  
14 Q52 Other congenital malformations of female genitalia  
15 Q53 Undescended testicle  
16 Q54 Hypospadias  
17 Q55 Other congenital malformations of male genital organs  
18 Q56 Indeterminate sex and pseudohermaphroditism  
19  
20 

---

*Congenital malformations of the urinary system*  
21 Q60 Renal agenesis and other reduction defects of kidney  
22 Q61 Cystic kidney disease  
23 Q62 Congenital obstructive defects of renal pelvis and congenital malformations of ureter  
24 Q63 Other congenital malformations of kidney  
25 Q64 Other congenital malformations of urinary system  
26  
27 

---

*Congenital malformations and deformations of the musculoskeletal system*  
28 Q65 Congenital deformities of hip  
29 Q66 Congenital deformities of feet  
30 Q67 Congenital musculoskeletal deformities of head, face, spine and chest  
31  
32  
33  
34  
35  
36  
37  
38  
39  
40  
41  
42  
43  
44  
45  
46

- 1  
2  
3 Q68 Other congenital musculoskeletal deformities  
4  
5 Q69 Polydactyly  
6  
7 Q70 Syndactyly  
8  
9 Q71 Reduction defects of upper limb  
10  
11 Q72 Reduction defects of lower limb  
12  
13 Q73 Reduction defects of unspecified limb  
14  
15 Q74 Other congenital malformations of limb(s)  
16  
17 Q75 Other congenital malformations of skull and face bones  
18  
19 Q76 Congenital malformations of spine and bony thorax  
20  
21 Q77 Osteochondrodysplasia with defects of growth of tubular bones and spine  
22  
23 Q78 Other osteochondrodysplasias  
24  
25 Q79 Congenital malformations of the musculoskeletal system, not elsewhere classified  
26  
27 

---

*Other congenital malformations*  
28  
29 Q80 Congenital ichthyosis  
30  
31 Q81 Epidermolysis bullosa  
32  
33 Q82 Other congenital malformations of skin  
34  
35 Q83 Congenital malformations of breast  
36  
37 Q84 Other congenital malformations of integument  
38  
39 Q85 Phakomatoses, not elsewhere classified  
40  
41 Q86 Congenital malformation syndromes due to known exogenous causes, not elsewhere classified  
42  
43 Q87 Other specified congenital malformation syndromes affecting multiple systems  
44  
45 Q89 Other congenital malformations, not elsewhere classified  
46

---

*Chromosomal abnormalities, not elsewhere classified*

- 1  
2  
3  
4  
5 Q90 Down syndrome  
6  
7 Q91 Edwards syndrome and Patau syndrome  
8  
9 Q92 Other trisomies and partial trisomies of the autosomes, not elsewhere classified  
10  
11 Q93 Monosomies and deletions from the autosomes, not elsewhere classified  
12  
13 Q95 Balanced rearrangements and structural markers, not elsewhere classified  
14  
15 Q96 Turner syndrome  
16  
17 Q97 Other sex chromosome abnormalities, female phenotype, not elsewhere classified  
18  
19 Q98 Other sex chromosome abnormalities, male phenotype, not elsewhere classified  
20  
21  
22  
23  
24  
25  
26  
27  
28  
29  
30  
31  
32  
33  
34  
35  
36  
37  
38  
39  
40  
41  
42  
43  
44  
45  
46
- 
- For peer review only



## STROBE Statement—checklist of items that should be included in reports of observational studies

|                              | Item No | Recommendation                                                                                                                                                                                                                                                                                                                                                                                                                                                         | Page No |
|------------------------------|---------|------------------------------------------------------------------------------------------------------------------------------------------------------------------------------------------------------------------------------------------------------------------------------------------------------------------------------------------------------------------------------------------------------------------------------------------------------------------------|---------|
| <b>Title and abstract</b>    | 1       | (a) Indicate the study's design with a commonly used term in the title or the abstract                                                                                                                                                                                                                                                                                                                                                                                 | 1       |
|                              |         | (b) Provide in the abstract an informative and balanced summary of what was done and what was found                                                                                                                                                                                                                                                                                                                                                                    | 2-3     |
| <b>Introduction</b>          |         |                                                                                                                                                                                                                                                                                                                                                                                                                                                                        |         |
| Background/rationale         | 2       | Explain the scientific background and rationale for the investigation being reported                                                                                                                                                                                                                                                                                                                                                                                   | 3-4     |
| Objectives                   | 3       | State specific objectives, including any prespecified hypotheses                                                                                                                                                                                                                                                                                                                                                                                                       | 4       |
| <b>Methods</b>               |         |                                                                                                                                                                                                                                                                                                                                                                                                                                                                        |         |
| Study design                 | 4       | Present key elements of study design early in the paper                                                                                                                                                                                                                                                                                                                                                                                                                | 5       |
| Setting                      | 5       | Describe the setting, locations, and relevant dates, including periods of recruitment, exposure, follow-up, and data collection                                                                                                                                                                                                                                                                                                                                        | 5-6     |
| Participants                 | 6       | (a) <i>Cohort study</i> —Give the eligibility criteria, and the sources and methods of selection of participants. Describe methods of follow-up<br><i>Case-control study</i> —Give the eligibility criteria, and the sources and methods of case ascertainment and control selection. Give the rationale for the choice of cases and controls<br><i>Cross-sectional study</i> —Give the eligibility criteria, and the sources and methods of selection of participants | 5-6     |
|                              |         | (b) <i>Cohort study</i> —For matched studies, give matching criteria and number of exposed and unexposed<br><i>Case-control study</i> —For matched studies, give matching criteria and the number of controls per case                                                                                                                                                                                                                                                 |         |
| Variables                    | 7       | Clearly define all outcomes, exposures, predictors, potential confounders, and effect modifiers. Give diagnostic criteria, if applicable                                                                                                                                                                                                                                                                                                                               | 5-6     |
| Data sources/<br>measurement | 8*      | For each variable of interest, give sources of data and details of methods of assessment (measurement). Describe comparability of assessment methods if there is more than one group                                                                                                                                                                                                                                                                                   | 4-5     |
| Bias                         | 9       | Describe any efforts to address potential sources of bias                                                                                                                                                                                                                                                                                                                                                                                                              | 5       |
| Study size                   | 10      | Explain how the study size was arrived at                                                                                                                                                                                                                                                                                                                                                                                                                              | 5       |
| Quantitative variables       | 11      | Explain how quantitative variables were handled in the analyses. If applicable, describe which groupings were chosen and why                                                                                                                                                                                                                                                                                                                                           | 6       |
| Statistical methods          | 12      | (a) Describe all statistical methods, including those used to control for confounding                                                                                                                                                                                                                                                                                                                                                                                  | 6       |
|                              |         | (b) Describe any methods used to examine subgroups and interactions                                                                                                                                                                                                                                                                                                                                                                                                    | 6       |
|                              |         | (c) Explain how missing data were addressed                                                                                                                                                                                                                                                                                                                                                                                                                            | 7       |
|                              |         | (d) <i>Cohort study</i> —If applicable, explain how loss to follow-up was addressed<br><i>Case-control study</i> —If applicable, explain how matching of cases and controls was addressed<br><i>Cross-sectional study</i> —If applicable, describe analytical methods taking account of sampling strategy                                                                                                                                                              | 6       |
|                              |         | (e) Describe any sensitivity analyses                                                                                                                                                                                                                                                                                                                                                                                                                                  |         |

Continued on next page

| <b>Results</b>           |     |                                                                                                                                                                                                                                                                                                                                                                                                               |                 |
|--------------------------|-----|---------------------------------------------------------------------------------------------------------------------------------------------------------------------------------------------------------------------------------------------------------------------------------------------------------------------------------------------------------------------------------------------------------------|-----------------|
| Participants             | 13* | (a) Report numbers of individuals at each stage of study—eg numbers potentially eligible, examined for eligibility, confirmed eligible, included in the study, completing follow-up, and analysed<br>(b) Give reasons for non-participation at each stage<br>(c) Consider use of a flow diagram                                                                                                               | 7 & Suppl Fig 1 |
| Descriptive data         | 14* | (a) Give characteristics of study participants (eg demographic, clinical, social) and information on exposures and potential confounders<br>(b) Indicate number of participants with missing data for each variable of interest<br>(c) <i>Cohort study</i> —Summarise follow-up time (eg, average and total amount)                                                                                           | Table 1         |
| Outcome data             | 15* | <i>Cohort study</i> —Report numbers of outcome events or summary measures over time<br><i>Case-control study</i> —Report numbers in each exposure category, or summary measures of exposure<br><i>Cross-sectional study</i> —Report numbers of outcome events or summary measures                                                                                                                             | 7, T1           |
| Main results             | 16  | (a) Give unadjusted estimates and, if applicable, confounder-adjusted estimates and their precision (eg, 95% confidence interval). Make clear which confounders were adjusted for and why they were included<br>(b) Report category boundaries when continuous variables were categorized<br>(c) If relevant, consider translating estimates of relative risk into absolute risk for a meaningful time period | 7-10<br>7-10    |
| Other analyses           | 17  | Report other analyses done—eg analyses of subgroups and interactions, and sensitivity analyses                                                                                                                                                                                                                                                                                                                | 7-10            |
| <b>Discussion</b>        |     |                                                                                                                                                                                                                                                                                                                                                                                                               |                 |
| Key results              | 18  | Summarise key results with reference to study objectives                                                                                                                                                                                                                                                                                                                                                      | 14              |
| Limitations              | 19  | Discuss limitations of the study, taking into account sources of potential bias or imprecision. Discuss both direction and magnitude of any potential bias                                                                                                                                                                                                                                                    | 15              |
| Interpretation           | 20  | Give a cautious overall interpretation of results considering objectives, limitations, multiplicity of analyses, results from similar studies, and other relevant evidence                                                                                                                                                                                                                                    | 15-16           |
| Generalisability         | 21  | Discuss the generalisability (external validity) of the study results                                                                                                                                                                                                                                                                                                                                         | 14              |
| <b>Other information</b> |     |                                                                                                                                                                                                                                                                                                                                                                                                               |                 |
| Funding                  | 22  | Give the source of funding and the role of the funders for the present study and, if applicable, for the original study on which the present article is based                                                                                                                                                                                                                                                 | 17              |

\*Give information separately for cases and controls in case-control studies and, if applicable, for exposed and unexposed groups in cohort and cross-sectional studies.

**Note:** An Explanation and Elaboration article discusses each checklist item and gives methodological background and published examples of transparent reporting. The STROBE checklist is best used in conjunction with this article (freely available on the Web sites of PLoS Medicine at <http://www.plosmedicine.org/>, Annals of Internal Medicine at <http://www.annals.org/>, and Epidemiology at <http://www.epidem.com/>). Information on the STROBE Initiative is available at [www.strobe-statement.org](http://www.strobe-statement.org).
