# Supplementary material for: Number and timing of primary cleft lip and palate repair surgeries in England: whole nation study of electronic health records before and during the COVID-19 pandemic
Source: PubMed Central journal article supplement (PMC10276964; doi:10.1136/bmjopen-2023-071973), 2023-06-13
Supplement: bmjopen-2023-071973supp001.pdf [file bmjopen-2023-071973supp001.pdf]

## SUPPLEMENTARY MATERIALS

**Supplementary Figure 1:** Flow chart showing inclusion criteria into the study

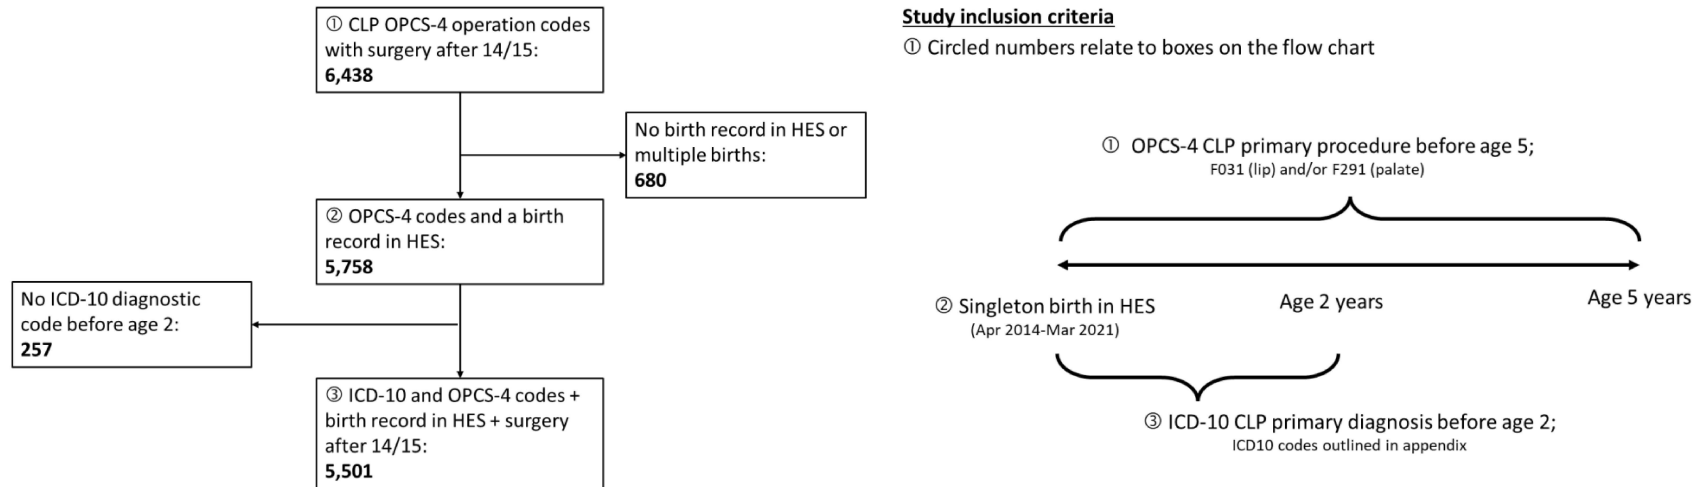

**Supplementary information 1: OPCS-4 CLP surgery procedure code lists**

| <b>OPCS-4 code</b> | <b>Surgery type</b>          |
|--------------------|------------------------------|
| F031               | Primary closure of cleft lip |
| F291               | Primary palate repair        |

**Supplementary information 2: Cleft lip and palate ICD-10 codes**

| <b>ICD-10 codes</b>    | <b>Cleft type</b>               |
|------------------------|---------------------------------|
| Q35x                   | Cleft lip                       |
| Q36x                   | Cleft palate                    |
| Q371, Q373, Q375, Q379 | Unilateral cleft lip and palate |
| Q370, Q372, Q374, Q378 | Bilateral cleft lip and palate  |

**Supplementary information 3: Congenital anomalies code list**

---

| Code                                                       | Description                                                   |
|------------------------------------------------------------|---------------------------------------------------------------|
| <i>Congenital malformations of the nervous system</i>      |                                                               |
| Q00                                                        | Anencephaly and similar malformations                         |
| Q01                                                        | Encephalocele                                                 |
| Q02                                                        | Microcephaly                                                  |
| Q03                                                        | Congenital hydrocephalus                                      |
| Q04                                                        | Other congenital malformations of brain                       |
| Q05                                                        | Spina bifida                                                  |
| Q06                                                        | Other congenital malformations of spinal cord                 |
| Q07                                                        | Other congenital malformations of nervous system              |
| <i>Congenital malformations of eye, ear, face and neck</i> |                                                               |
| Q10                                                        | Congenital ptosis                                             |
| Q11                                                        | Anophthalmos, microphthalmos and macrophthalmos               |
| Q12                                                        | Congenital lens malformations                                 |
| Q13                                                        | Congenital malformations of anterior segment of eye           |
| Q14                                                        | Congenital malformations of posterior segment of eye          |
| Q15                                                        | Other congenital malformations of eye                         |
| Q16                                                        | Congenital malformations of ear causing impairment of hearing |
| Q17                                                        | Other congenital malformations of ear                         |

|       |                                                               |
|-------|---------------------------------------------------------------|
| Q18   | Other congenital malformations of face and neck               |
| <hr/> |                                                               |
|       | <i>Congenital malformations of the circulatory system</i>     |
| Q20   | Congenital malformations of cardiac chambers and connections  |
| Q21   | Congenital malformations of cardiac septa                     |
| Q22   | Congenital malformations of pulmonary and tricuspid valves    |
| Q23   | Congenital malformations of aortic and mitral valves          |
| Q24   | Other congenital malformations of heart                       |
| Q25   | Congenital malformations of great arteries                    |
| Q26   | Congenital malformations of great veins                       |
| Q27   | Other congenital malformations of peripheral vascular system  |
| Q28   | Other congenital malformations of circulatory system          |
| <hr/> |                                                               |
|       | <i>Congenital malformations of the respiratory system</i>     |
| Q30   | Congenital malformations of nose                              |
| Q31   | Congenital malformations of larynx                            |
| Q32   | Congenital malformations of trachea and bronchus              |
| Q33   | Congenital malformations of lung                              |
| Q34   | Other congenital malformations of respiratory system          |
| <hr/> |                                                               |
|       | <i>Other congenital malformations of the digestive system</i> |
| Q38   | Other congenital malformations of tongue, mouth and pharynx   |
| Q39   | Congenital malformations of oesophagus                        |
| Q40   | Other congenital malformations of upper alimentary tract      |
| Q41   | Congenital absence, atresia and stenosis of small intestine   |

Q42 Congenital absence, atresia and stenosis of large intestine

Q43 Other congenital malformations of intestine

Q44 Congenital malformations of gallbladder, bile ducts and liver

Q45 Other congenital malformations of digestive system

---

*Congenital malformations of the genital organs*

Q50 Congenital malformations of ovaries, fallopian tubes and broad ligaments

Q51 Congenital malformations of uterus and cervix

Q52 Other congenital malformations of female genitalia

Q53 Undescended testicle

Q54 Hypospadias

Q55 Other congenital malformations of male genital organs

Q56 Indeterminate sex and pseudohermaphroditism

---

*Congenital malformations of the urinary system*

Q60 Renal agenesis and other reduction defects of kidney

Q61 Cystic kidney disease

Q62 Congenital obstructive defects of renal pelvis and congenital malformations of ureter

Q63 Other congenital malformations of kidney

Q64 Other congenital malformations of urinary system

---

*Congenital malformations and deformations of the musculoskeletal system*

Q65 Congenital deformities of hip

Q66 Congenital deformities of feet

Q67 Congenital musculoskeletal deformities of head, face, spine and chest

- Q68 Other congenital musculoskeletal deformities
- Q69 Polydactyly
- Q70 Syndactyly
- Q71 Reduction defects of upper limb
- Q72 Reduction defects of lower limb
- Q73 Reduction defects of unspecified limb
- Q74 Other congenital malformations of limb(s)
- Q75 Other congenital malformations of skull and face bones
- Q76 Congenital malformations of spine and bony thorax
- Q77 Osteochondrodysplasia with defects of growth of tubular bones and spine
- Q78 Other osteochondrodysplasias
- Q79 Congenital malformations of the musculoskeletal system, not elsewhere classified

---

*Other congenital malformations*

- Q80 Congenital ichthyosis
  - Q81 Epidermolysis bullosa
  - Q82 Other congenital malformations of skin
  - Q83 Congenital malformations of breast
  - Q84 Other congenital malformations of integument
  - Q85 Phakomatoses, not elsewhere classified
  - Q86 Congenital malformation syndromes due to known exogenous causes, not elsewhere classified
  - Q87 Other specified congenital malformation syndromes affecting multiple systems
  - Q89 Other congenital malformations, not elsewhere classified
-

---

*Chromosomal abnormalities, not elsewhere classified*

- Q90 Down syndrome
  - Q91 Edwards syndrome and Patau syndrome
  - Q92 Other trisomies and partial trisomies of the autosomes, not elsewhere classified
  - Q93 Monosomies and deletions from the autosomes, not elsewhere classified
  - Q95 Balanced rearrangements and structural markers, not elsewhere classified
  - Q96 Turner syndrome
  - Q97 Other sex chromosome abnormalities, female phenotype, not elsewhere classified
  - Q98 Other sex chromosome abnormalities, male phenotype, not elsewhere classified
  - Q99 Other chromosome abnormalities, not elsewhere classified
-
